# Supplementary material for: Mobility study of young women who exchange sex for money or commodities using Google Maps and qualitative methods in Kampala, Uganda
Source: PubMed Central journal article supplement — BMJ Open. 2021 May 19;11(5):e043078. doi: 10.1136/bmjopen-2020-043078 (PMC8137195; doi:10.1136/bmjopen-2020-043078), 2021-05-19
Supplement: bmjopen-2020-043078.draft_revisions.pdf [file bmjopen-2020-043078.draft_revisions.pdf]

# BMJ Open

BMJ Open is committed to open peer review. As part of this commitment we make the peer review history of every article we publish publicly available.

When an article is published we post the peer reviewers' comments and the authors' responses online. We also post the versions of the paper that were used during peer review. These are the versions that the peer review comments apply to.

The versions of the paper that follow are the versions that were submitted during the peer review process. They are not the versions of record or the final published versions. They should not be cited or distributed as the published version of this manuscript.

BMJ Open is an open access journal and the full, final, typeset and author-corrected version of record of the manuscript is available on our site with no access controls, subscription charges or pay-per-view fees (<http://bmjopen.bmj.com>).

If you have any questions on BMJ Open's open peer review process please email [info.bmjopen@bmj.com](mailto:info.bmjopen@bmj.com)

# BMJ Open

## High Mobility of Young Women who Exchange Sex for Money or Commodities and HIV Risk in Kampala, Uganda

|                               |                                                                                                                                                                                                                                                                                                                                                                                                                                                                                    |
|-------------------------------|------------------------------------------------------------------------------------------------------------------------------------------------------------------------------------------------------------------------------------------------------------------------------------------------------------------------------------------------------------------------------------------------------------------------------------------------------------------------------------|
| Journal:                      | <i>BMJ Open</i>                                                                                                                                                                                                                                                                                                                                                                                                                                                                    |
| Manuscript ID                 | bmjopen-2020-043078                                                                                                                                                                                                                                                                                                                                                                                                                                                                |
| Article Type:                 | Original research                                                                                                                                                                                                                                                                                                                                                                                                                                                                  |
| Date Submitted by the Author: | 05-Aug-2020                                                                                                                                                                                                                                                                                                                                                                                                                                                                        |
| Complete List of Authors:     | King, Rachel; UCSF Medical Center, Global Health Sciences<br>Muhanguzi, Eva; University of California San Francisco<br>Nakitto, Miriam; MRC/UVRI and LSHTM Uganda Research Unit<br>Mirembe, Miriam; MRC/UVRI and LSHTM Uganda Research Unit<br>Kasujja, Francis; MRC/UVRI and LSHTM Uganda Research Unit<br>Bagiire, Daniel; MRC/UVRI and LSHTM Uganda Research Unit<br>Seeley, Janet; London School of Hygiene and Tropical Medicine,<br>Department of Global Health &Development |
| Keywords:                     | HIV & AIDS < INFECTIOUS DISEASES, PUBLIC HEALTH, QUALITATIVE RESEARCH                                                                                                                                                                                                                                                                                                                                                                                                              |
|                               |                                                                                                                                                                                                                                                                                                                                                                                                                                                                                    |

SCHOLARONE™  
Manuscripts

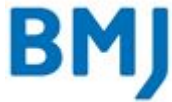

I, the Submitting Author has the right to grant and does grant on behalf of all authors of the Work (as defined in the below author licence), an exclusive licence and/or a non-exclusive licence for contributions from authors who are: i) UK Crown employees; ii) where BMJ has agreed a CC-BY licence shall apply, and/or iii) in accordance with the terms applicable for US Federal Government officers or employees acting as part of their official duties; on a worldwide, perpetual, irrevocable, royalty-free basis to BMJ Publishing Group Ltd ("BMJ") its licensees and where the relevant Journal is co-owned by BMJ to the co-owners of the Journal, to publish the Work in this journal and any other BMJ products and to exploit all rights, as set out in our [licence](#).

The Submitting Author accepts and understands that any supply made under these terms is made by BMJ to the Submitting Author unless you are acting as an employee on behalf of your employer or a postgraduate student of an affiliated institution which is paying any applicable article publishing charge ("APC") for Open Access articles. Where the Submitting Author wishes to make the Work available on an Open Access basis (and intends to pay the relevant APC), the terms of reuse of such Open Access shall be governed by a Creative Commons licence – details of these licences and which [Creative Commons](#) licence will apply to this Work are set out in our licence referred to above.

Other than as permitted in any relevant BMJ Author's Self Archiving Policies, I confirm this Work has not been accepted for publication elsewhere, is not being considered for publication elsewhere and does not duplicate material already published. I confirm all authors consent to publication of this Work and authorise the granting of this licence.

1  
2  
3 **High Mobility of Young Women who Exchange Sex for Money or Commodities and HIV**  
4 **Risk in Kampala, Uganda**  
5  
6  
7

8 Running Head

9 High Mobility Among Young Sex Workers in Uganda  
10  
11

12 Rachel L KING<sup>1</sup>, Eva MUHANGUZI<sup>1</sup>, Miriam NAKKITO<sup>2</sup>, Miriam MIREMBE<sup>2</sup>, Francis  
13 KASUJJA<sup>2</sup>, Daniel BAGIIRE<sup>2</sup>, Janet SEELEY<sup>2,3</sup>  
14  
15

16 1 University of California, San Francisco, Global Health Sciences, San Francisco, CA, USA

17 2 Medical Research Council, Uganda Virus Research Institute, London School of Hygiene and  
18 Tropical Medicine Research Unit, Kampala, Uganda

19 3 London School of Hygiene and Tropical Medicine, London, UK  
20

21 Key words: Uganda, sex work, HIV  
22

23 Word count main text: 3587

24 Word count abstract: 290  
25

26 Funded by National Institutes of Mental Health  
27 R01MH109337  
28  
29

30 Corresponding author:

31 Rachel King

32 Email: [Rachel.King@UCSF.EDU](mailto:Rachel.King@UCSF.EDU)

33 Tel: +256785304516  
34  
35  
36  
37  
38  
39  
40  
41  
42  
43  
44  
45  
46  
47  
48  
49  
50  
51  
52  
53  
54  
55  
56  
57  
58  
59  
60

**ABSTRACT****Introduction:**

Adolescent girls and young women (AGYW) engaged in sex in exchange for money and/or commodities are at particular risk in countries with high HIV prevalence and high fertility rates. High mobility increases exposures to HIV risk. We aimed to map mobility patterns amongst young women engaged in sex work within a randomized controlled trial (RCT) to assess how mobility exposes and enhances HIV risk in a highly vulnerable population.

**Methods:**

Participants were eligible if 15-24 years-old, HIV-negative and engaged in sex work. They were randomized to a cognitive-behavioral therapy intervention focusing on health literacy and social media skills, or standard of care at specialized clinic for high-risk women. At study visits, participants used Google maps to identify work-venues, and we conducted 30 interviews on mobility with: high-risk women, bar owners/managers, male partners and sex-worker managers on distance, frequency and reasons for mobility. We used Python software to analyze mapping data.

**Results:**

Of 644 participants, 56% had primary or no education. By mid-March 2020, 236 had attended both 12 and 18-month study visits. Participants mapped 1198 work venues. 81% identified different work sites across time points. For 11% of participants, work venues extended to distant (> 40km) including islands on Lake Victoria and as far as Canada. Interviews found lack of education, violence, lack of agency, social support networks and poverty as reasons for mobility.

**Conclusions:**

YWHR are highly mobile. Study and care retention strategies should be cognizant and tailored to suit YWHR mobility patterns. Peers, bar and lodge managers who have influence on YWHR lives and mobility, should be involved in research and health care service activities. A mobile clinic at work venues offering diagnosis and treatment and study activities is currently being piloted to assess its feasibility for retaining YWHR in care.

### Strengths and limitations of this study

- This study investigates behavior of one of the most vulnerable populations to HIV, STI and unwanted pregnancy in sub-Saharan Africa; young sex workers aged 15-24 years old.
- This study illuminates detailed factors that motivate young sex worker mobility over time and the relationships between mobility and high risk sexual behavior
- This study employed both qualitative and a mapping methodology to explore participants' own descriptions of distance, frequency and reasons for mobility as well as mapped locations that highlight very high levels of mobility
- The data gathered here are highly contextual and specific to the study context; the findings may not translate to other regions of sub-Saharan Africa or elsewhere
- In this analysis, we have not combined the STI results with the mobility data as the study follow-up is not yet concluded

### INTRODUCTION

Adolescent girls and young women (AGYW) engaged in sex in exchange for money and/or commodities are at particular risk in countries with high HIV prevalence and high fertility rates.<sup>1-3</sup> Young women may differentiate between commercial and transactional sex work based on stigma or relationship status.<sup>4,6</sup> In some cases, sex work is the only source of family income, and in others, women use transactional sex to supplement income.<sup>7</sup> Transactional sex may thus be situational or temporary, and associated with acute shortfalls in cash, need for school fees or food insecurity.<sup>8,9</sup> Sex work is often socially stigmatizing<sup>10</sup> whereas informal transactional sex may be socially accepted in some, situations, or contexts.<sup>11</sup> Globally, female sex workers (FSW) of all ages are over 10 times more likely to be living with HIV than women in the general population.<sup>12</sup> In sub-Saharan Africa in 2012, the average HIV prevalence among FSW was greater than 35%,<sup>12</sup> with 20-40% of FSW entering sex work as adolescents with a mean age of entry of 16 years or younger.

1  
2  
3 In Uganda, about 12% of adolescent girls and young women (AGYW) report  
4 transactional sex,<sup>13-15</sup> Young people in Uganda have an HIV prevalence of 3.7%  
5 nationally, yet younger FSW have about a four to seven times higher prevalence of  
6 HIV,<sup>16-17</sup> with FSW over 15 years old in Kampala reported to have between 33%-37%  
7 HIV infection.<sup>18,19</sup> In addition, FSW under 16 years old, new to sex work are dramatically  
8 more vulnerable than older colleagues to violence, STIs and HIV and poorer access to  
9 services.<sup>20-26</sup> Yet, despite rising numbers of young FSW and their recognized  
10 vulnerability, there have been few interventions to date that have targeted this group.<sup>3,26</sup>  
11  
12 High mobility increases young FSW exposure to risk.<sup>27,28</sup> Mobility can place people in  
13 situations that increase their risk of acquiring STIs, HIV and other infections.<sup>27,29-31</sup>  
14 Studies have reported that mobility is associated with concurrent sexual partners which  
15 further increases risk to HIV and other STIs.<sup>32</sup> Studies from Europe have shown that  
16 migrants diagnosed with HIV are more likely to present late for treatment and care than  
17 nationals.<sup>33</sup> Settling into a new place also presents challenges and instability affecting  
18 finding food and medical care<sup>34</sup>; these include irregular housing status, language and  
19 cultural barriers, cost of services, a lack of youth-inclusive health policies and  
20 accessible services.<sup>28</sup> In this paper, we report patterns of, and reasons for, young  
21 women at higher risk (YWHR) mobility and the links between mobility and HIV risk  
22 among YWHR participating in a randomized controlled trial (RCT) that aims to assess  
23 the effectiveness of a cognitive behavioral and structural HIV prevention intervention on  
24 reducing the frequency of unprotected sex in Kampala, Uganda.  
25  
26  
27  
28  
29  
30  
31  
32  
33  
34  
35  
36  
37  
38  
39  
40  
41  
42  
43  
44  
45  
46  
47  
48  
49  
50  
51  
52  
53  
54  
55  
56  
57  
58  
59  
60

## METHODS

### Setting:

This study was based within the Good Health for Women Project (GHWP) clinic in Kampala, Uganda. GHWP is an independent clinic established in 2008 to provide HIV and other STI prevention, care and treatment to FSW, their partners and their children in a confidentially-located, safe location. Since inception, GHWP has been a site for conducting research on the context and underlying factors of HIV risk.<sup>7,19,35-40</sup> To protect the confidentiality and safety of participants, GHWP is located in an accessible area of central Kampala not identifiable to the general public as a place frequented specifically by participants at high risk of HIV infection.

### Procedures:

#### Mapping of work venues

The first aim of this sub-study was to explore the dynamics of the social and sexual networks, mobility and context of YWHR in Kampala. Work venues of our RCT participants have been mapped in two ways: qualitative and quantitative data collection using key informant interviews of four categories of participants in urban Kampala: YWHR, peer educators, sex worker managers and male partners. In-depth interviews of YWHR study participants explored where, why, how, when, how frequently and for how long they move using interview guides. In addition, together with a staff member, the participant used Google maps to point out the location and improve the accuracy of the work venues' latitude and longitude coordinates at two time points. An exploratory



1  
2  
3 analysis using Python and Pandas library was conducted to gain a better understanding  
4  
5 of the data aspects such as the main features of the data, identifying the important  
6  
7 variables. This was then used to store the data after pre-processing. Finally, descriptive  
8  
9 statistics were tabulated.  
10

11  
12 Community mapping of work venues identified areas sometimes termed 'hot spots'  
13  
14 where HIV high-risk youth congregate. Mapping has been dynamic as new 'hotspots'  
15  
16 were discovered over time and new information built on data obtained from community  
17  
18 members and the study field team who have strong relationships with participant  
19  
20 community members built over more than 10 years. The interviews, lasting about one  
21  
22 hour, took place in secure and private spaces at the GHWP clinic offices with only  
23  
24 researcher and participant present.  
25  
26  
27  
28

29  
30  
31 All interviewed participants received UgSh 20,000 (USD \$8.00) as compensation for their  
32  
33 transport expenses as is current practice for all other studies at GHWP.  
34  
35  
36  
37

### 38 **Data collection and analysis**

39  
40 Interviewers were university-trained social scientists and research counsellors, who  
41  
42 conducted in-depth interviews in the local language (Luganda) and have interest in the  
43  
44 research topic. Interviews were recorded and field notes taken. Discussions were held  
45  
46 before and during the study regarding the sensitive (illegal) nature of sex work in Uganda  
47  
48 and how that may affect the research as well as the safety of staff and participants. The  
49  
50 interviewers (three women; one man) had over five years of experience working with high  
51  
52 risk women and are known and trusted in the participant community.  
53  
54  
55  
56  
57  
58  
59  
60

1  
2  
3  
4  
5 Interview recordings and notes were transcribed and translated into English. Coding of  
6 data was conducted using NVIVO12 for Mac by two coders and focused on descriptive  
7 thematic coding.<sup>41</sup> Analysis focused on both apriori and emerging content, identifying the  
8 dominant and the range of explanations and comparisons across clients. Multiple  
9 interactive discussions were held with the analysis team and senior researchers to  
10 validate data interpretation.  
11  
12  
13  
14  
15  
16  
17  
18  
19  
20

### 21 **Patient and Public Involvement**

22 Interaction with patients' in the study was done deliberately from the formative phase  
23 where they shared their priorities, experiences and preferences which informed and  
24 guided the development of the research questions, measures and intervention. Patients  
25 were not directly involved in the original study design but they were directly engaged in  
26 recruitment of study participants and gave significant input into intervention  
27 development with regards to content and form. In other studies at the research site, we  
28 have brought study participants together to discuss and validate preliminary results. The  
29 same will be done for these results when the study follow-up is completed.  
30  
31  
32  
33  
34  
35  
36  
37  
38  
39  
40  
41  
42  
43  
44  
45  
46

### 47 **FINDINGS**

48 We recruited 644 YWHR participants for the RCT. All participants were HIV-negative at  
49 enrolment. For this sub-study, 21 peer educators, five '*queen mothers*' or bar owners  
50 and 10 male partners were recruited for qualitative interviews. A "Queen mother" is the  
51  
52  
53  
54  
55  
56  
57  
58  
59  
60

1  
2  
3 term used by participants and can roughly translate as a sex work manager. The  
4  
5 median age of YWHR sample at baseline was 20 years, 46% of whom were 15-19  
6  
7 years old. With regards to educational level, 7% of YWHR had reached A-level or  
8  
9 beyond and about half had some primary education. Nobody refused to be interviewed.  
10  
11

12  
13  
14 By 15 March 2020, of the 236 participants who attended both 12- and 18- month follow-  
15  
16 up visits, 193 (82)% identified different work venues across these time points.  
17  
18

19  
20  
21 Work venues span distances from Sudan, Kenya and Rwanda, rural Uganda and  
22  
23 Kampala. The median distance travelled was five kilometers (km) with an interquartile  
24  
25 range of 4-10 in active Kampala work venues like Makindye and Bwaise, with the clinic  
26  
27 coordinates as reference point. Most (85%) of the movement was within a radius of 15  
28  
29 km from Kampala. 15% of the movements were beyond 15km from Kampala. Figure 1  
30  
31 highlights the density of different work locations within Uganda.  
32  
33  
34

35  
36  
37  
38  
39  
40 More older women (20-24 year-olds) travelled farther (greater than 15km) compared to  
41  
42 YWHR aged 15-19 years. Some participants described frequenting up to twelve  
43  
44 workplaces in the previous month. Seven YWHR participants had seroconverted at  
45  
46 their 6-month visit, three at 12 months and three at 18 months  
47  
48

49  
50  
51 In interviews we asked YWHR, male partners, bar managers and owners, and “queen  
52  
53 mothers” reasons for high mobility. Five basic themes emerged: lack of education and  
54  
55  
56  
57  
58  
59

1  
2  
3 employment opportunities, violence, lack of agency, social/sexual/familial networks and  
4  
5 poverty.  
6  
7  
8  
9  
10

11  
12 I. Lack of education and employment options leading to mobility  
13

14  
15 With little or no education or job training, participants narrated life stories that they  
16 described as 'failed dreams'. One participant, the tenth child in her family, described her  
17 dream as a young girl of wishing to become a doctor. With insufficient money to  
18 continue her education, she had a second dream of hotel management. As this dream  
19 did not materialize, she described survival strategies that included moving from place to  
20 place doing sex work. Changing dreams led to changing locations. Another participant,  
21 the ninth child in her family, recounted her story of deciding to stop school to help her  
22 parents stop worrying about her school fees. She said: [when teachers], "*chase you*  
23 *from school and you spend a week at home*" it was very difficult on the whole family.  
24 Some YWHR mentioned stealing money as a way to survive without a job and running  
25 from one place to another not to be caught by police or by the people they stole from.  
26  
27  
28  
29  
30  
31  
32  
33  
34  
35  
36  
37  
38  
39  
40  
41  
42

43 *"You go to a club in Wandegeya [a Kampala quarter] and meet a man who gives you*  
44 *20,000/= [~6 USD] to go and buy beer... It is at that point that you get out of the club*  
45 *and move to another bar... You disappear ... When you go to [another bar] and meet*  
46 *someone who gives you 10,000/= to buy beer, you also leave ... By the end of the*  
47 *day, all you have done is cheat them of their money without much effort" (YWHR,*  
48 *early 20s)*  
49  
50  
51  
52  
53  
54  
55  
56  
57  
58  
59  
60

1  
2  
3  
4  
5  
6 II. Violence between YWHR and customers and between themselves  
7

8 YWHR described situations where violence was a part of their lives inflicted by  
9 customers neglecting to wear condoms. One YWHR narrating her experiences working  
10 on the Ssesse Islands: “*You may ask a man to wear a condom and those are automatic*  
11 *punches.*” Other YWHR describe how when regular partners find them in bars  
12 unexpectedly and beat them for that.  
13  
14  
15  
16  
17  
18  
19  
20  
21

22 *You may sometimes be at work and he finds you, “What are you doing here at*  
23 *night?” he asks. He beats you up... You are definitely forced to leave that place*  
24 *because he has embarrassed you before your customers. (YWHR, early 20s)*  
25  
26  
27  
28  
29  
30

31 Physical violence, or the threat of violence, perpetrated by boyfriends, colleagues or  
32 pimps was reported as a reason for frequent mobility; sometimes as a response to what  
33 may have been thought of as wrongdoing:  
34  
35  
36  
37  
38  
39  
40

41 *. . . when we steal from customers... should he find you, he can box you [Laughs*  
42 *heartedly]... Should he get you, he can beat you up. So, you have to be really*  
43 *witty. Some men have families and they budget how much they are to spend on*  
44 *a prostitute .. say about 5,000/= [~1.30 USD]... you come and take it all, you also*  
45 *take his phone. Should he find you, he can surely beat you up (YWHR, early 20s)*  
46  
47  
48  
49  
50  
51  
52  
53

54 A YWHR, whose parents had both died when she was under 10 years old and who was  
55  
56  
57  
58  
59  
60

1  
2  
3 raised by her uncle, narrated her experience of leaving that home soon after her parents  
4 died and starting sex work under 15 years old. She described how customers in bars  
5 would often give young women too much alcohol so that they would get very drunk and  
6 then force them to have sex without payment. A second YWHR recounted the story of a  
7 friend who was sold to an overseas sex worker-dealer and broke her legs when she  
8 was thrown off a balcony.  
9

10  
11  
12  
13  
14  
15  
16  
17  
18  
19 *Sometimes you might even be put in a room with twenty men and you're to sleep*  
20 *with all of them in one night ... (young sex worker, HIV positive, early 20s)*  
21  
22  
23

24  
25  
26 One male partner described that some relationships between YWHR may become  
27 violent.  
28  
29

30  
31  
32  
33 *They are so violent. They fight too much ...one gets to a point where they cannot*  
34 *live with anyone ... Alcohol and the things they use [other drugs]... fighting also*  
35 *causes them to move ... they are drunk full-time (Male partner)*  
36  
37  
38  
39

40  
41  
42 Drug use, tension and infighting among YWHR are all reasons for mobility.  
43  
44

### 45 46 47 III. Lack of agency in relation to mobility

48  
49  
50 Some participants noted that YWHR do not often have full control over their lives and  
51 the movement in their lives. They could be at the mercy of clients, queen mothers,  
52 whomever is providing housing, the police, bar owners or managers. One male partner  
53  
54  
55  
56  
57  
58  
59  
60

1  
2  
3 noted that some bars bring a group of young women, about ten, on the weekends, take  
4 them back to rural areas on Monday, and bring a new group the following weekend.  
5  
6  
7  
8  
9

10 *“They have to keep on moving because it's not good when the clients get used to*  
11 *their faces... Clients only give good money to fresh faces... With time they go back to*  
12 *the places they've been before. They just keep on rotating (moving)” (Bar owner)*  
13  
14  
15  
16  
17  
18

19 Some young women work under a manager who has control over their mobility; when,  
20 where, how frequently and for how long they work in certain locations. A male partner  
21 described how negotiations take place between the manager and the venue owner  
22 regarding the young women who are brought from rural areas to work in some locations  
23 in Kampala.  
24  
25  
26  
27  
28  
29  
30  
31  
32

33 *It's the boss [the pimp/queen mother] for those [girls]... they go anywhere she tells*  
34 *them to” (Male partner)*  
35  
36  
37  
38  
39

40 In other situations, law enforcement will regulate young women's movements by  
41 coercing money out of them or forcing them to move. Some women mentioned how  
42 during seasons when police may need money, they will harass YWHR; this will be  
43 another reason for their mobility.  
44  
45  
46  
47  
48  
49  
50

51 *Sometimes the police come and search for us and they do not want you there... Like*  
52 *Christmas season...they round you up; we get little money and they want some of it*  
53  
54  
55  
56  
57  
58  
59  
60

1  
2  
3 ...You run to some place where they do not know you, . . . (YWHR, early 20s)  
4  
5  
6  
7  
8  
9

10 IV. How social networks and social support relate to mobility  
11

12 Participants described home environments where there is no social or financial support.  
13

14 In some cases, YWHR have had to leave school due to the death of parents. These  
15  
16 situations can lead to mobility to escape an unstable or unhealthy setting.  
17  
18  
19

20  
21  
22 *They don't have parents. Some have caretakers who aren't their biological parents;*  
23  
24 *they have faced many social issues. They keep on moving from one place to*  
25  
26 *another ...Their needs are not met... they are out of school... (Health worker)*  
27  
28  
29

30  
31 YWHR described how they preferred to stay close to their friends, who may be  
32  
33 replacing a family network, so that when a friend moves from one place to another they  
34  
35 follow along and go together. One participant explained how YWHR count on each  
36  
37 other for safety, that they '*have to be there for each other*' and therefore if one feels she  
38  
39 has to move, the others will follow.  
40  
41  
42  
43  
44  
45  
46  
47

48 V. Poverty leads to mobility  
49

50 The overarching reason for why participants constantly move was financial. One  
51  
52 participant mentioned that they travel to different towns to target market days. Other  
53  
54 illustrations of this association included descriptions of accommodations that are daily  
55  
56  
57  
58  
59  
60



1  
2  
3 rate lodges where one has to leave if she cannot pay for the night. Searching for bars  
4 where they could have loyal or regular, customers, leaving venues that were already  
5 claimed by other sex workers; or going to a place where customers pay higher prices  
6 were all situations connecting poverty and mobility.  
7  
8  
9  
10  
11  
12  
13

14 *The reason we kept leaving, was money. They may be buying sex workers here for*  
15 *5,000/= and elsewhere they are buying them at 10,000/= or 15,000/= (YWHR, early*  
16 *20s)*  
17  
18  
19  
20  
21  
22  
23

24 *The biggest reason we left that place was that there were colleagues that had*  
25 *specific customers and they would tell us to look for **our** customers that were*  
26 *dedicated and attached to us... The reason was to get a new place (YWHR, early*  
27 *20s)*  
28  
29  
30  
31  
32  
33  
34

35 In addition to the reasons for mobility, we asked about frequency of travel, distances  
36 traveled. The farthest distances travelled included Mombasa, Mauritius, Dubai, Juba  
37 and Canada.  
38  
39  
40  
41  
42  
43

44 Reasons for participants' mobility concentrated around five themes including lack of  
45 education and employment opportunities, violence, agency, limited family support/social  
46 networks as well as poverty. Sub-themes and connections between these themes show  
47 a complex web of drivers of mobility and high-risk behavior.  
48  
49  
50  
51  
52  
53  
54  
55  
56  
57  
58  
59  
60

## DISCUSSION

Our findings highlight that YWHR in Kampala are highly mobile, with multiple push and pull factors associated with mobility. We found that participants were far more mobile than we anticipated, with both greater distances, greater frequency and destinations of movement.

Previous studies dating back to early 2000s, showed that a number of factors were associated with initiating sex work in Uganda and the region; including low levels of education, broken family systems, limited job market and low access to sexual and reproductive health services and these are similar to the factors we have found that influence mobility.<sup>42,43</sup> Limited access to sexual and reproductive health for AGYW is an important factor related to the high level of unexpected pregnancies among this age group. Maternal mortality is the second largest cause of deaths among adolescent girls aged 15–19 globally. Of all annual births, around 16 million are among girls in this age range; about 2 million are among girls under the age of 15.<sup>44</sup> In addition, 41% of young women 20-24-years old and nearly half of those who experienced sexual violence, were pregnant, the highest rate in sub-Saharan Africa.<sup>45</sup> With limited education, and very high national unemployment, many young women have very few options in making enough money to feed themselves and their children. This of course is exacerbated with the current COVID-19 crisis.

Some sex worker studies conducted in sub-Saharan Africa have highlighted how migration into urban areas to sell sex has resulted in conflicts and violence with local sex workers.<sup>46</sup> Our participants also described how they often moved in order not to

1  
2  
3 compete with other women or to find a venue where they could cultivate loyal clients.  
4

5  
6 Violence and fear of violence has been reported as closely intertwined with mobility,  
7  
8 poverty, substance abuse and risk for HIV in India.<sup>47,48</sup> Intimate partner violence (IPV)  
9  
10 is highly associated with risk for HIV and Ugandan women and female sex workers  
11  
12 report extremely high rates of reported IPV (45%-75% globally).<sup>49,50</sup> <sup>18</sup> Among Ugandan  
13  
14 women, 20-24 years old, 40% have experienced sexual violence.<sup>51,52</sup> In our study,  
15  
16 violence was reported as perpetrated by police, regular and non-regular partners, other  
17  
18 sex workers and managers or pimps, and was a reason for mobility. The reasons were  
19  
20 to run from a conflictual situation or towards a potentially better situation. Ramesh and  
21  
22 colleagues demonstrated that participants who were more mobile were more likely to  
23  
24 report violence and that sex workers reporting both mobility and violence were more  
25  
26 likely to be infected with HIV.<sup>47</sup> There are many studies globally reporting correlation  
27  
28 between violence and increased risk for HIV.<sup>49</sup> Physical, sexual and psychological  
29  
30 violence increase susceptibility to HIV among women and girls often through a  
31  
32 clustering of factors that include poverty, substance use, social, gender norms that  
33  
34 weave into an intractable pattern of higher risk environment.<sup>49</sup>  
35  
36  
37  
38  
39  
40  
41  
42

43 The proposed pathways showing higher mobility associated with HIV risk in other  
44  
45 studies demonstrate that female sex workers who travel more often reported less  
46  
47 consistent condom use, have higher STI symptoms, and greater perceived risk for HIV  
48  
49 acquisition even after controlling for demographic and socio-economic factors including  
50  
51 violence.<sup>53,29,54,55</sup> In our study, over 80% of the participants were mobile, so it is difficult  
52  
53 to correlate a statistical relationship between mobility with higher-risk behavior. We do,  
54  
55  
56  
57  
58  
59  
60

1  
2  
3 however, note that reasons for mobility are all similar to the reasons for entering into  
4 sex work and are qualitatively related to high-risk sexual behavior.  
5  
6  
7  
8  
9

10 To improve our understanding of the dynamic nature of movement, sexual behavior and  
11 the relationships between populations and disease transmission, Cassels et al.

12 proposed a network-dyadic conceptual model to interpret previous studies and inform  
13 the development of services and research.<sup>56</sup> They propose that the transmission of HIV  
14 is dependent on movement and people's behavior which is influenced by the connecting  
15 of local sub-epidemics, and the effects on both sending and receiving communities.<sup>56</sup>  
16  
17  
18  
19  
20  
21  
22  
23

24 We propose that the intricate, dynamic and complex nature of relationships between  
25 both formal and informal sex work, poverty, substance use, family members, friends,  
26 and queenmother relationship networks, violence, and mobility are constantly changing  
27 and impacting on each other in different and convoluted ways. How public health  
28 intervention development features into the complex interactions of the lives of  
29 participants is complex, delicate and the greater understanding we acquire into how  
30 mobility impacts on our ability to intervene the more effective these interventions will  
31 likely become.  
32  
33  
34  
35  
36  
37  
38  
39  
40  
41  
42  
43

44 Study retention strategies and health care services should be informed by a more  
45 comprehensive and nuanced understanding of the complicated lives of participants and  
46 services, and interventions should be tailored to suit mobility patterns. Peers, bar/lodge  
47 managers who have influence on YWHR lives and mobility should be involved in  
48 research activities if retention of YWHR is to be attained. A mobile clinic, conducted  
49  
50  
51  
52  
53  
54  
55  
56  
57  
58  
59  
60

1  
2  
3 within active work venues, has been piloted to assess its feasibility for reducing the  
4 transport burden on highly mobile participants and increasing retention in care. We have  
5 attempted to understand whether and how mobility influences the effectiveness of HIV  
6 prevention services specifically with YWHR and the utility of identifying appropriate  
7 approaches and methods, inclusive of mobile populations, that are desperately needed  
8 at this critical moment in the HIV epidemic.<sup>28</sup>  
9  
10  
11  
12  
13  
14  
15  
16  
17  
18

### 19 **Footnotes**

- 21 • Contributors: RK (PhD) conceived of the study. EM and DB conducted the  
22 geography data analysis and provided input on study design and study  
23 procedures. MM, a female research counsellor, participated in data collection.  
24 FK, MM and MN oversaw data collection. RK was primarily responsible for  
25 qualitative data analysis, with input from JS. RK composed the first draft of the  
26 manuscript. All authors provided input and approved of the final submission.  
27
- 28 • Funding: This study was supported by the National Institutes of Mental Health  
29 (R01MH109337), PI: Rachel King. All authors are independent from the funders  
30 and had full access to all of the data. All authors take responsibility for the  
31 integrity of the data and accuracy of the data analysis.  
32
- 33 • Competing interests: None declared.
- 34 • Patient consent for publication: All participants gave written informed consent to  
35 participate.  
36
- 37 • Ethics approval: This research was approved by the Uganda Virus Research  
38 Institute (#GC/127/16/08/527) and the Ugandan National Council for Science and  
39 Technology (#HS1886).
- 40 • Provenance and peer review: Not commissioned; externally peer reviewed.
- 41 • Data availability statement: Data are available upon reasonable request.  
42 Deidentified data may be shared upon reasonable request by emailing the first  
43 author.  
44  
45  
46  
47  
48  
49  
50

### 51 **REFERENCES**

52  
53  
54  
55  
56  
57  
58  
59  
60

1. Idele P, Gillespie A, Porth T, et al. Epidemiology of HIV and AIDS among adolescents: current status, inequities, and data gaps. *J Acquir Immune Defic Syndr*. 2014;66 Suppl 2:S144-153.
2. Stover J, Rosen J, Kasedde S, Idele P, McClure C. The impact and cost of the HIV/AIDS investment framework for adolescents. *J Acquir Immune Defic Syndr*. 2014;66 Suppl 2:S170-175.
3. Busza J, Mtetwa, S., Mapfumo, R., Hanisch, D., Wong-Gruenwald, R., Cowan, F. Underage and underserved: reaching young women who sell sex in Zimbabwe. *AIDS CARE*. 2016;28(S2):14-20.
4. MacPherson EE, Sadalaki J, Njoloma M, et al. Transactional sex and HIV: understanding the gendered structural drivers of HIV in fishing communities in Southern Malawi. *J Int AIDS Soc*. 2012;15 Suppl 1:1-9.
5. Ngugi EN, Benoit C, Hallgrimsdottir H, Jansson M, Roth EA. Family Kinship Patterns and Female Sex Work in the Informal Urban Settlement of Kibera, Nairobi, Kenya. *Hum Ecol Interdiscip J*. 2012;40(3):397-403.
6. Hunter M. The materiality of everyday sex: thinking beyond "prostitution". *African Studies*. 2002;61:99-120.
7. Mbonye M, Nakamanya S, Nalukenge W, King R, Vandepitte J, Seeley J. 'It is like a tomato stall where someone can pick what he likes': structure and practices of female sex work in Kampala, Uganda. *BMC Public Health*. 2013;13:741.
8. Miller CL, Bangsberg DR, Tuller DM, et al. Food insecurity and sexual risk in an HIV endemic community in Uganda. *AIDS Behav*. 2011;15(7):1512-1519.

- 1  
2  
3 9. Wamoyi J, Ranganathan M, Kyegombe N, Stoebenau K. Improving the  
4 measurement of transactional sex in Sub-Saharan Africa: a critical review.  
5  
6 *Journal of Acquired Immune Deficiency Syndromes*. 2019;80(4):367.  
7  
8
- 9  
10 10. Bantebya G, Muhanguzi, FK, Watson, C. *Adolescent girls in the balance:*  
11  
12 *Changes and continuity in social norms and practices around marriage and*  
13  
14 *education in Uganda*. Kampala, Uganda: ODI;2014.  
15
- 16  
17 11. Stoebenau K, Heise L, Wamoyi J, Bobrova N. Revisiting the understanding of  
18  
19 “transactional sex” in sub-Saharan Africa: a review and synthesis of the literature.  
20  
21 *Social Science and Medicine*. 2016;168:186-197.  
22
- 23  
24 12. Baral S, Beyrer C, Muessig K, et al. Burden of HIV among female sex workers in  
25  
26 low-income and middle-income countries: a systematic review and meta-  
27  
28 analysis. *Lancet Infectious Disease*. 2012;12(7):538-549.  
29
- 30  
31 13. Walker D, Perezniето, P, Bantebya, G, Ochen, E. *Sexual exploitation of*  
32  
33 *adolescent girls in Uganda: The drivers, consequences and responses to the*  
34  
35 *‘sugar daddy’ phenomenon*. Kampala, Uganda: ODI;2014.  
36
- 37  
38 14. Bakeera-Kitaka S, Nabukeera-Barungi N, Nostlinger C, Addy K, Colebunders R.  
39  
40 Sexual risk reduction needs of adolescents living with HIV in a clinical care  
41  
42 setting. *AIDS Care*. 2008;20(4):426-433.  
43
- 44  
45 15. Lowenthal ED, Bakeera-Kitaka S, Marukutira T, Chapman J, Goldrath K, Ferrand  
46  
47 RA. Perinatally acquired HIV infection in adolescents from sub-Saharan Africa: a  
48  
49 review of emerging challenges. *Lancet Infect Dis*. 2014;14(7):627-639.  
50
- 51  
52 16. MOH. *Uganda AIDS Indicator Survey 2011*. Kampala, Uganda and Calverton,  
53  
54 Maryland, USA2012.  
55  
56  
57  
58  
59  
60

17. MOH. *The Crane Survey Report*. Kampala, Uganda: MOH;2009.
18. Hladik W, Baughman AL, Serwadda D, et al. Burden and characteristics of HIV infection among female sex workers in Kampala, Uganda - a respondent-driven sampling survey. *BMC Public Health*. 2017;17(1):565.
19. Vandepitte J, Bukenya J, Weiss HA, et al. HIV and other sexually transmitted infections in a cohort of women involved in high-risk sexual behavior in Kampala, Uganda. *Sex Transm Dis*. 2011;38(4):316-323.
20. Goldenberg S, Silverman J, Engstrom D, Bojorquez-Chapela I, Strathdee S. "Right Here is the Gateway": Mobility, Sex Work Entry and HIV Risk Along the Mexico-U.S. Border. *Int Migr*. 2014;52(4):26-40.
21. Goldenberg SM, Chettiar J, Simo A, et al. Early sex work initiation independently elevates odds of HIV infection and police arrest among adult sex workers in a Canadian setting. *J Acquir Immune Defic Syndr*. 2014;65(1):122-128.
22. Goldenberg SM, Rangel G, Vera A, et al. Exploring the impact of underage sex work among female sex workers in two Mexico-US border cities. *AIDS Behav*. 2012;16(4):969-981.
23. Odinkova V, Rusakova M, Urada LA, Silverman JG, Raj A. Police sexual coercion and its association with risky sex work and substance use behaviors among female sex workers in St. Petersburg and Orenburg, Russia. *Int J Drug Policy*. 2014;25(1):96-104.
24. Rocha-Jimenez T, Brouwer KC, Silverman JG, Morales-Miranda S, Goldenberg SM. Exploring the Context and Implementation of Public Health Regulations



- 1  
2  
3 Governing Sex Work: A Qualitative Study with Migrant Sex Workers in  
4 Guatemala. *J Immigr Minor Health*. 2016.  
5  
6  
7  
8 25. Servin AE, Brouwer KC, Gordon L, et al. Vulnerability Factors and Pathways  
9  
10 Leading to Underage Entry into Sex Work in two Mexican-US Border Cities. *J*  
11  
12 *Appl Res Child*. 2015;6(1).  
13  
14  
15 26. Silverman JG. Adolescent female sex workers: invisibility, violence and HIV. *Arch*  
16  
17 *Dis Child*. 2011;96(5):478-481.  
18  
19  
20 27. Camlin CS, Akullian A, Neilands TB, et al. Gendered dimensions of population  
21  
22 mobility associated with HIV across three epidemics in rural Eastern Africa.  
23  
24 *Health Place*. 2019;57:339-351.  
25  
26  
27 28. Camlin CS, Cassels S, Seeley J. Bringing population mobility into focus to  
28  
29 achieve HIV prevention goals. *J Int AIDS Soc*. 2018;21 Suppl 4:e25136.  
30  
31  
32 29. Kishamawe C, Vissers DC, Urassa M, et al. Mobility and HIV in Tanzanian  
33  
34 couples: both mobile persons and their partners show increased risk. *AIDS*.  
35  
36 2006;20(4):601-608.  
37  
38  
39 30. McGrath N, Eaton JW, Newell ML, Hosegood V. Migration, sexual behaviour,  
40  
41 and HIV risk: a general population cohort in rural South Africa. *Lancet HIV*.  
42  
43 2015;2(6):e252-259.  
44  
45  
46 31. Camlin CS, El Ayadi AM, Kwena ZA, et al. High Mobility and HIV Prevalence  
47  
48 Among Female Market Traders in East Africa in 2014. *J Acquir Immune Defic*  
49  
50 *Syndr*. 2017;74(5):e121-e128.  
51  
52  
53  
54  
55  
56  
57  
58  
59  
60

- 1  
2  
3 32. Camlin CS, Akullian A, Neilands TB, et al. Population mobility associated with  
4 higher risk sexual behaviour in eastern African communities participating in a  
5 Universal Testing and Treatment trial. *J Int AIDS Soc.* 2018;21 Suppl 4:e25115.  
6  
7  
8  
9  
10 33. Hernando V, Alvarez-del Arco D, Alejos B, et al. HIV Infection in Migrant  
11 Populations in the European Union and European Economic Area in 2007-2012:  
12 An Epidemic on the Move. *J Acquir Immune Defic Syndr.* 2015;70(2):204-211.  
13  
14  
15 34. Cassels S, Camlin CS, Seeley J. One step ahead: timing and sexual networks in  
16 population mobility and HIV prevention and care. *J Int AIDS Soc.* 2018;21 Suppl  
17 4:e25140.  
18  
19  
20  
21  
22  
23 35. Vandepitte J WH, Bukenya J, Nakubulwa S, Mayanja Y, Matovu G, Kyakuwa  
24 N, Hughs P, Hayes R, Grosskurth, H. Alcohol use, Mycoplasma genitalium and  
25 other STIs associated with HIV incidence among women at high risk in Kampala,  
26 Uganda. *JAIDS.* 2013;62(1)(1):119-126.  
27  
28  
29  
30  
31  
32 36. Vandepitte J, Muller E, Bukenya J, et al. Prevalence and correlates of  
33 Mycoplasma genitalium infection among female sex workers in Kampala,  
34 Uganda. *J Infect Dis.* 2012;205(2):289-296.  
35  
36  
37  
38  
39 37. Vandepitte J WH, Kyakuwa N, Nakubulwa S, Muller E, Buve A, Van der Stuyft P,  
40 Hayes R, Grosskurth, H. Natural history of mycoplasma genitalium infection in a  
41 cohort of female sex workers in Kampala, Uganda. *Sex Transm Dis.*  
42 2013;40(5):422-427.  
43  
44  
45  
46  
47  
48 38. Bukenya J, Vandepitte J, Kwikiriza M, Weiss HA, Hayes R, Grosskurth H.  
49 Condom use among female sex workers in Uganda. *AIDS Care.* 2013;25(6):767-  
50 774.  
51  
52  
53  
54  
55  
56  
57  
58  
59  
60

- 1  
2  
3 39. Francis SC, Baisley K, Lees SS, et al. Vaginal practices among women at high  
4 risk of HIV infection in Uganda and Tanzania: recorded behaviour from a daily  
5 pictorial diary. *PLoS One*. 2013;8(3):e59085.  
6  
7  
8  
9  
10 40. Mbonye M, Nalukenge W, Nakamanya S, et al. Gender inequity in the lives of  
11 women involved in sex work in Kampala, Uganda. *J Int AIDS Soc*. 2012;15 Suppl  
12 1:1-9.  
13  
14  
15  
16  
17 41. Boyatzis R. Transforming Qualitative Information: Thematic Analysis and Code  
18 Development. *SAGE Publications, Inc*. 1998.  
19  
20  
21 42. MOH. *Adolescent Health Policy Guidelines and Service Standards for Uganda*.  
22 *Uganda: MOH*. 2011.  
23  
24  
25  
26 43. MOH. Adolescent Sexual and Reproductive Health: A Job Aide 2012. 2012.  
27  
28 44. WHO. Adolescent pregnancy. [https://www.who.int/newsroom/fact-](https://www.who.int/newsroom/fact-sheets/detail/adolescent-pregnancy)  
29 [sheets/detail/adolescent-pregnancy](https://www.who.int/newsroom/fact-sheets/detail/adolescent-pregnancy). Published 2020. Accessed 08 April 2020.  
30  
31  
32  
33 45. UNFPA. *Adolescents and Young People in Sub-Saharan Africa Opportunities*  
34 *and Challenges*. Johannesburg: UNFPA;2012.  
35  
36  
37  
38 46. Chiyaka T, Mushati P, Hensen B, et al. Reaching young women who sell sex:  
39 Methods and results of social mapping to describe and identify young women for  
40 DREAMS impact evaluation in Zimbabwe. *PLoS One*. 2018;13(3):e0194301.  
41  
42  
43  
44 47. Ramesh S, Ganju D, Mahapatra B, Mishra RM, Saggurti N. Relationship between  
45 mobility, violence and HIV/STI among female sex workers in Andhra Pradesh,  
46 India. *BMC Public Health*. 2012;12:764.  
47  
48  
49  
50  
51  
52  
53  
54  
55  
56  
57  
58  
59  
60

- 1  
2  
3 48. Saggurti N, Jain AK, Sebastian MP, et al. Indicators of mobility, socio-economic  
4 vulnerabilities and HIV risk behaviours among mobile female sex workers in  
5 India. *AIDS Behav.* 2012;16(4):952-959.  
6  
7  
8  
9  
10 49. STRIVE. *Addressing the structural drivers of HIV: A STRIVE synthesis* London  
11 School of Hygiene & Tropical Medicine; UK, 2019;2019.  
12  
13  
14 50. Roberts ST, Haberer J, Celum C, et al. Intimate Partner Violence and Adherence  
15 to HIV Pre-exposure Prophylaxis (PrEP) in African Women in HIV Serodiscordant  
16 Relationships: A Prospective Cohort Study. *J Acquir Immune Defic Syndr.*  
17 2016;73(3):313-322.  
18  
19  
20  
21  
22 51. Amegbor PM, Pascoe L. Variations in Emotional, Sexual, and Physical Intimate  
23 Partner Violence Among Women in Uganda: A Multilevel Analysis. *J Interpers*  
24 *Violence.* 2019:886260519839429.  
25  
26  
27  
28  
29  
30 52. Cabral A, J MB, Ngure K, et al. Intimate Partner Violence and Self-Reported Pre-  
31 exposure Prophylaxis Interruptions Among HIV-Negative Partners in HIV  
32 Serodiscordant Couples in Kenya and Uganda. *J Acquir Immune Defic Syndr.*  
33 2018;77(2):154-159.  
34  
35  
36  
37  
38  
39 53. Saggurti N, Ravi K. Verma, Hanimi Reddy Modugu, Saumya RamaRao, Ajay  
40 Kumar Singh, Vaishali Sharma Mahendra, and, Jain. AK. *Patterns of*  
41 *migration/mobility and HIV risk among female sex workers: Andhra Pradesh*  
42 *2007–08.* New Delhi, India: Population Council.;2008.  
43  
44  
45  
46  
47  
48  
49 54. Saggurti N, Jain, AK., Sebastian, MP., Singh, R., Modugu, HR., Halli, SS.,  
50 Verma, RK. Indicators of Mobility, Socio-Economic Vulnerabilities and HIV Risk  
51  
52  
53  
54  
55  
56  
57  
58  
59  
60

1  
2  
3 Behaviours Among Mobile Female Sex Workers in India. *AIDS Behav.*  
4  
5 2012;16:952–959.  
6

7  
8 55. Camlin CS, Hosegood V, Newell ML, McGrath N, Barnighausen T, Snow RC.  
9  
10 Gender, migration and HIV in rural KwaZulu-Natal, South Africa. *PLoS One.*  
11  
12 2010;5(7):e11539.  
13

14  
15 56. Cassels S, Jenness SM, Khanna AS. Conceptual framework and research  
16  
17 methods for migration and HIV transmission dynamics. *AIDS Behav.*  
18  
19 2014;18(12):2302-2313.  
20  
21  
22  
23  
24  
25  
26  
27  
28  
29  
30  
31  
32  
33  
34  
35  
36  
37  
38  
39  
40  
41  
42  
43  
44  
45  
46  
47  
48  
49  
50  
51  
52  
53  
54  
55  
56  
57  
58  
59  
60

1  
2  
3  
4  
5  
6  
7  
8  
9  
10  
11  
12  
13  
14  
15  
16  
17  
18  
19  
20  
21  
22  
23  
24  
25  
26  
27  
28  
29  
30  
31  
32  
33  
34  
35  
36  
37  
38  
39  
40  
41  
42  
43  
44  
45  
46  
47  
48  
49  
50  
51  
52  
53  
54  
55  
56  
57  
58  
59  
60

For peer review only

## COREQ (COnsolidated criteria for REporting Qualitative research) Checklist

A checklist of items that should be included in reports of qualitative research. You must report the page number in your manuscript where you consider each of the items listed in this checklist. If you have not included this information, either revise your manuscript accordingly before submitting or note N/A.

| Topic                                          | Item No. | Guide Questions/Description                                                                                                                              | Reported on Page No. |
|------------------------------------------------|----------|----------------------------------------------------------------------------------------------------------------------------------------------------------|----------------------|
| <b>Domain 1: Research team and reflexivity</b> |          |                                                                                                                                                          |                      |
| <i>Personal characteristics</i>                |          |                                                                                                                                                          |                      |
| Interviewer/facilitator                        | 1        | Which author/s conducted the interview or focus group?                                                                                                   | 18                   |
| Credentials                                    | 2        | What were the researcher's credentials? E.g. PhD, MD                                                                                                     | 6                    |
| Occupation                                     | 3        | What was their occupation at the time of the study?                                                                                                      | 6                    |
| Gender                                         | 4        | Was the researcher male or female?                                                                                                                       | 6                    |
| Experience and training                        | 5        | What experience or training did the researcher have?                                                                                                     | 6                    |
| <i>Relationship with participants</i>          |          |                                                                                                                                                          |                      |
| Relationship established                       | 6        | Was a relationship established prior to study commencement?                                                                                              | 6                    |
| Participant knowledge of the interviewer       | 7        | What did the participants know about the researcher? e.g. personal goals, reasons for doing the research                                                 | 6                    |
| Interviewer characteristics                    | 8        | What characteristics were reported about the interviewer/facilitator? e.g. Bias, assumptions, reasons and interests in the research topic                | 6                    |
| <b>Domain 2: Study design</b>                  |          |                                                                                                                                                          |                      |
| <i>Theoretical framework</i>                   |          |                                                                                                                                                          |                      |
| Methodological orientation and Theory          | 9        | What methodological orientation was stated to underpin the study? e.g. grounded theory, discourse analysis, ethnography, phenomenology, content analysis | 7                    |
| <i>Participant selection</i>                   |          |                                                                                                                                                          |                      |
| Sampling                                       | 10       | How were participants selected? e.g. purposive, convenience, consecutive, snowball                                                                       | 6                    |
| Method of approach                             | 11       | How were participants approached? e.g. face-to-face, telephone, mail, email                                                                              | 6                    |
| Sample size                                    | 12       | How many participants were in the study?                                                                                                                 | 7                    |
| Non-participation                              | 13       | How many people refused to participate or dropped out? Reasons?                                                                                          | 8                    |
| <i>Setting</i>                                 |          |                                                                                                                                                          |                      |
| Setting of data collection                     | 14       | Where was the data collected? e.g. home, clinic, workplace                                                                                               | 6                    |
| Presence of non-participants                   | 15       | Was anyone else present besides the participants and researchers?                                                                                        | 6                    |
| Description of sample                          | 16       | What are the important characteristics of the sample? e.g. demographic data, date                                                                        | 8                    |
| <i>Data collection</i>                         |          |                                                                                                                                                          |                      |
| Interview guide                                | 17       | Were questions, prompts, guides provided by the authors? Was it pilot tested?                                                                            | 5                    |
| Repeat interviews                              | 18       | Were repeat interviews carried out? If yes, how many?                                                                                                    | 8                    |
| Audio/visual recording                         | 19       | Did the research use audio or visual recording to collect the data?                                                                                      | 6                    |
| Field notes                                    | 20       | Were field notes made during and/or after the interview or focus group?                                                                                  | 6                    |
| Duration                                       | 21       | What was the duration of the interviews or focus group?                                                                                                  | 6                    |
| Data saturation                                | 22       | Was data saturation discussed?                                                                                                                           | na                   |
| Transcripts returned                           | 23       | Were transcripts returned to participants for comment and/or                                                                                             | na                   |

| Topic                                  | Item No. | Guide Questions/Description                                                                                                        | Reported on Page No. |
|----------------------------------------|----------|------------------------------------------------------------------------------------------------------------------------------------|----------------------|
|                                        |          | correction?                                                                                                                        |                      |
| <b>Domain 3: analysis and findings</b> |          |                                                                                                                                    |                      |
| <i>Data analysis</i>                   |          |                                                                                                                                    |                      |
| Number of data coders                  | 24       | How many data coders coded the data?                                                                                               | 7                    |
| Description of the coding tree         | 25       | Did authors provide a description of the coding tree?                                                                              | na                   |
| Derivation of themes                   | 26       | Were themes identified in advance or derived from the data?                                                                        | 7                    |
| Software                               | 27       | What software, if applicable, was used to manage the data?                                                                         | 7                    |
| Participant checking                   | 28       | Did participants provide feedback on the findings?                                                                                 | 7                    |
| <i>Reporting</i>                       |          |                                                                                                                                    |                      |
| Quotations presented                   | 29       | Were participant quotations presented to illustrate the themes/findings?<br>Was each quotation identified? e.g. participant number | 8-14                 |
| Data and findings consistent           | 30       | Was there consistency between the data presented and the findings?                                                                 | 15                   |
| Clarity of major themes                | 31       | Were major themes clearly presented in the findings?                                                                               | 15                   |
| Clarity of minor themes                | 32       | Is there a description of diverse cases or discussion of minor themes?                                                             |                      |

Developed from: Tong A, Sainsbury P, Craig J. Consolidated criteria for reporting qualitative research (COREQ): a 32-item checklist for interviews and focus groups. *International Journal for Quality in Health Care*. 2007. Volume 19, Number 6: pp. 349–357

**Once you have completed this checklist, please save a copy and upload it as part of your submission. DO NOT include this checklist as part of the main manuscript document. It must be uploaded as a separate file.**



# BMJ Open

## Mobility Study of Young Women who Exchange Sex for Money or Commodities using Google Maps and Qualitative Methods in Kampala, Uganda

|                                 |                                                                                                                                                                                                                                                                                                                                                                                                                                                                                  |
|---------------------------------|----------------------------------------------------------------------------------------------------------------------------------------------------------------------------------------------------------------------------------------------------------------------------------------------------------------------------------------------------------------------------------------------------------------------------------------------------------------------------------|
| Journal:                        | <i>BMJ Open</i>                                                                                                                                                                                                                                                                                                                                                                                                                                                                  |
| Manuscript ID                   | bmjopen-2020-043078.R1                                                                                                                                                                                                                                                                                                                                                                                                                                                           |
| Article Type:                   | Original research                                                                                                                                                                                                                                                                                                                                                                                                                                                                |
| Date Submitted by the Author:   | 07-Feb-2021                                                                                                                                                                                                                                                                                                                                                                                                                                                                      |
| Complete List of Authors:       | King, Rachel; UCSF Medical Center, Global Health Sciences<br>Muhanguzi, Eva; University of California San Francisco<br>Nakitto, Miriam; MRC/UVRI and LSHTM Uganda Research Unit<br>Mirembe, Miriam; MRC/UVRI and LSHTM Uganda Research Unit<br>Kasujja, Francis; MRC/UVRI and LSHTM Uganda Research Unit<br>Bagiire, Daniel; MRC/UVRI and LSHTM Uganda Research Unit<br>Seeley, Janet; London School of Hygiene and Tropical Medicine, Department of Global Health & Development |
| <b>Primary Subject Heading</b>: | HIV/AIDS                                                                                                                                                                                                                                                                                                                                                                                                                                                                         |
| Secondary Subject Heading:      | Global health, HIV/AIDS, Qualitative research                                                                                                                                                                                                                                                                                                                                                                                                                                    |
| Keywords:                       | HIV & AIDS < INFECTIOUS DISEASES, PUBLIC HEALTH, QUALITATIVE RESEARCH                                                                                                                                                                                                                                                                                                                                                                                                            |
|                                 |                                                                                                                                                                                                                                                                                                                                                                                                                                                                                  |

SCHOLARONE™  
Manuscripts



I, the Submitting Author has the right to grant and does grant on behalf of all authors of the Work (as defined in the below author licence), an exclusive licence and/or a non-exclusive licence for contributions from authors who are: i) UK Crown employees; ii) where BMJ has agreed a CC-BY licence shall apply, and/or iii) in accordance with the terms applicable for US Federal Government officers or employees acting as part of their official duties; on a worldwide, perpetual, irrevocable, royalty-free basis to BMJ Publishing Group Ltd ("BMJ") its licensees and where the relevant Journal is co-owned by BMJ to the co-owners of the Journal, to publish the Work in this journal and any other BMJ products and to exploit all rights, as set out in our [licence](#).

The Submitting Author accepts and understands that any supply made under these terms is made by BMJ to the Submitting Author unless you are acting as an employee on behalf of your employer or a postgraduate student of an affiliated institution which is paying any applicable article publishing charge ("APC") for Open Access articles. Where the Submitting Author wishes to make the Work available on an Open Access basis (and intends to pay the relevant APC), the terms of reuse of such Open Access shall be governed by a Creative Commons licence – details of these licences and which [Creative Commons](#) licence will apply to this Work are set out in our licence referred to above.

Other than as permitted in any relevant BMJ Author's Self Archiving Policies, I confirm this Work has not been accepted for publication elsewhere, is not being considered for publication elsewhere and does not duplicate material already published. I confirm all authors consent to publication of this Work and authorise the granting of this licence.

1  
2  
3 **Mobility Study of Young Women who Exchange Sex for Money or Commodities using**  
4 **Google Maps and Qualitative Methods in Kampala, Uganda**  
5  
6  
7

8 Running Head

9 High Mobility Among Young Sex Workers in Uganda  
10  
11

12 Rachel L KING<sup>1</sup>, Eva MUHANGUZI<sup>1</sup>, Miriam NAKKITO<sup>2</sup>, Miriam MIREMBE<sup>2</sup>, Francis  
13 KASUJJA<sup>2</sup>, Daniel BAGIIRE<sup>2</sup>, Janet SEELEY<sup>2,3</sup>  
14  
15

16 1 University of California, San Francisco, Global Health Sciences, San Francisco, CA, USA

17 2 Medical Research Council, Uganda Virus Research Institute, London School of Hygiene and  
18 Tropical Medicine Research Unit, Kampala, Uganda

19 3 Global Health and Development Department; London School of Hygiene and Tropical  
20 Medicine, London, UK  
21

22 Key words: Uganda, sex work, HIV  
23

24 Word count main text: 4635

25 Word count abstract: 295

26 References: 56  
27

28 Funded by National Institutes of Mental Health (NIMH)

29 R01MH109337  
30  
31

32 Corresponding author:

33 Rachel King

34 Email: [Rachel.King@UCSF.EDU](mailto:Rachel.King@UCSF.EDU)

35 Tel: +256785304516  
36  
37  
38  
39  
40  
41  
42  
43  
44  
45  
46  
47  
48  
49  
50  
51  
52  
53  
54  
55  
56  
57  
58  
59  
60

**ABSTRACT****Objectives:**

We aimed to assess mobility patterns and reasons for high mobility amongst young women engaged in sex work within a randomized controlled trial to gauge how mobility may enhance HIV risk in a highly vulnerable population.

**Setting:**

Participants were recruited from a clinic in Kampala Uganda that was set up for women at high risk of HIV infection.

**Participants:**

Adolescent girls and young women engaged in sex for money and/or commodities are at particular risk in countries with high HIV prevalence and high fertility rates. High mobility increases exposure to HIV risk. Women participants were eligible if 15-24 years-old, HIV-negative and engaged in sex work.

**Interventions:**

Participants were randomized to a cognitive-behavioral therapy intervention focusing on health literacy and social media skills, or standard of care at specialized clinic for high-risk women.

**Measures:** Participants used Google maps to identify work-venues at 12 and 18 month study visits. We also conducted 34 interviews on mobility with: high-risk women, male partners, health workers and sex-worker managers. Topics included: distance, frequency and reasons for mobility. We used Python software to analyze mapping data.

**Results:**

By mid-March 2020, 236 participants had attended both 12 and 18-month study visits. Participants mapped 1198 work venues. 522 (81%) identified different work sites across time points. For seven (3%) participants, work venues extended to distant (> 40km) islands on Lake Victoria and as far as Canada. Interviews found lack of education, violence, lack of agency, social support networks and poverty as reasons for mobility.

**Conclusions:**

Young women at high risk are highly mobile. Retention strategies should be cognizant and tailored to suit mobility patterns. Peers, and managers who have influence on participant's lives and mobility, should be involved in research and healthcare services. A mobile clinic at work venues offering diagnosis, treatment and study activities is being piloted.

### Strengths and limitations of this study

- This study investigates behavior of one of the most vulnerable populations to HIV, sexually transmitted infections (STI) and unwanted pregnancy in sub-Saharan Africa; young sex workers aged 15-24 years old.
- This study illuminates detailed factors that motivate young sex worker mobility over time and the potential relationships between mobility and high-risk sexual behavior
- This study employed both qualitative and a mapping methodology to explore participants' own descriptions of distance, frequency and reasons for mobility as well as mapped locations that highlight very high levels of mobility giving insight into options to inform better suited intervention
- The data gathered here are highly contextual and specific to the study population and environment; the findings may not translate to other regions of sub-Saharan Africa or elsewhere
- In this analysis, we have not combined the STI results with the mobility data

### INTRODUCTION

Adolescent girls and young women engaged in sex in exchange for money and/or commodities are at particular risk in countries with high HIV prevalence and high fertility rates.<sup>1-3</sup> Young women may differentiate between commercial and transactional sex work based on stigma or relationship status.<sup>4,5</sup> In some cases, sex work is the only source of family income, and in others, women use transactional sex to supplement income.<sup>6</sup> Transactional sex may thus be situational or temporary, and associated with acute shortfalls in cash, need for school fees or food insecurity.<sup>7,8</sup> Sex work is often socially stigmatizing<sup>9</sup> whereas informal transactional sex may be socially accepted in some, situations, or contexts.<sup>10</sup> Globally, female sex workers (FSW) of all ages are over 10 times more likely to be living with HIV than women in the general population.<sup>11</sup> In sub-Saharan Africa in 2012, the average HIV prevalence among FSW was greater than 35%,<sup>11</sup> with 20-40% of FSW entering sex work as adolescents with a mean age of entry of 16 years or younger.

1  
2  
3 In Uganda, about 12% of adolescent girls and young women report transactional sex,<sup>12-</sup>  
4  
5  
6 <sup>14</sup> Young people in Uganda have an HIV prevalence of 3.7% nationally, yet younger  
7  
8 female sex workers have about a four to seven times higher prevalence of HIV,<sup>15 16</sup>  
9  
10 with female sex workers over 15 years old in Kampala reported to have between 33%-  
11  
12 37% HIV infection.<sup>17,18</sup> In addition, female sex workers under 16 years old, new to sex  
13  
14 work are dramatically more vulnerable than older colleagues to violence, STIs and HIV  
15  
16 and poorer access to services.<sup>19-25</sup> Yet, despite rising numbers of young female sex  
17  
18 workers and their recognized vulnerability, there have been few interventions to date  
19  
20 that have targeted this group.<sup>3,25</sup>  
21  
22  
23  
24  
25

26 Studies in India have found that sex-work-related mobility is often undertaken to  
27  
28 maximize trade opportunity.<sup>26</sup> In East Africa, research around mobility has highlighted  
29  
30 that mobility both short and longer -term was associated with higher-risk behaviours, and is  
31  
32 strongly associated with gender: the HIV risks associated with mobility are more prominent for  
33  
34 women than for men.<sup>27</sup>  
35  
36  
37  
38  
39

40 High mobility increases young female sex workers exposure to risk.<sup>27,28</sup> Mobility can  
41  
42 place people in situations that increase their risk of acquiring STIs, HIV and other  
43  
44 infections. <sup>28-31</sup> Studies have reported that mobility is associated with concurrent sexual  
45  
46 partners which further increases risk to HIV and other STIs.<sup>32</sup> Studies from Europe have  
47  
48 shown that migrants diagnosed with HIV are more likely to present late for treatment  
49  
50 and care than nationals.<sup>33</sup> Settling into a new place also presents challenges and  
51  
52 instability affecting finding food and medical care<sup>34</sup>; these include irregular housing  
53  
54  
55  
56  
57  
58  
59  
60

1  
2  
3 status, language and cultural barriers, cost of services, a lack of youth-inclusive health  
4 policies and accessible services.<sup>27</sup> In this paper, we report patterns of, and reasons for,  
5  
6 young women at higher risk (YWHR) mobility and the potential links between mobility  
7  
8 and HIV risk among YWHR participating in a randomized controlled trial (RCT) that  
9  
10 aims to assess the effectiveness of a cognitive behavioral and structural HIV prevention  
11  
12 intervention (the ZETRA trial) on reducing the frequency of unprotected sex in Kampala,  
13  
14  
15 Uganda.  
16  
17  
18  
19  
20  
21  
22  
23

## 24 **METHODS**

### 25 **Setting:**

26  
27  
28  
29 This study was based within the Good Health for Women Project clinic in Kampala,  
30  
31 Uganda. This clinic was an independent clinic established in 2008 to provide HIV and  
32  
33 other STI prevention, care and treatment to FSW, their partners and their children in a  
34  
35 safe location. Since inception, the clinic has been a site for conducting research on the  
36  
37 context and underlying factors of HIV risk.<sup>6,18,35-40</sup> The clinic offered routine HIV  
38  
39 counselling and testing, syndromic management of sexually transmitted infections,  
40  
41 family planning, antenatal care, free condoms, risk reduction counselling, counselling for  
42  
43 excessive alcohol use, tuberculosis screening and treatment, ART and co-  
44  
45 trimoxazole/dapsone preventive therapy. Enrolled women attended quarterly visits for  
46  
47 HIV prevention and treatment services and study visits every six months. This clinic  
48  
49 would generally see about 50 sex workers per day during the time of the study. To  
50  
51 protect the confidentiality and safety of participants, it was located in an accessible area  
52  
53  
54  
55  
56  
57  
58  
59  
60

1  
2  
3 of central Kampala not identifiable to the general public as a place frequented  
4  
5 specifically by participants at high risk of HIV infection.  
6  
7  
8  
9

## 10 **Procedures:**

### 11 **Mapping of work venues**

12  
13  
14 The first aim of this sub-study was to explore the dynamics of the social and sexual  
15 networks, mobility and context of YWHR in Kampala. Work venues of our randomized  
16 controlled trial participants have been mapped in two ways: qualitative and quantitative  
17 data collection using key informant interviews of four categories of participants in urban  
18 Kampala: YWHR, peer educators, sex worker managers and male partners. In-depth  
19 interviews of YWHR study participants explored where, why, how, when, how frequently  
20 and for how long they move using interview guides.  
21  
22  
23  
24  
25  
26  
27  
28  
29

### 30 **Participant enrolment**

31  
32  
33 Randomized parent study. Participants were recruited from a specialized clinic in  
34 Kampala called the “Good Health for Women Project” clinic described above. Women  
35 were recruited for this clinic by field workers who conducted mobilization activities with  
36 community peer sex worker-leaders to identify sex workers from commercial hotspots  
37 who were then enrolled at the clinic irrespective of HIV status as has been described by  
38 Vandepitte et al. All enrolled women attended quarterly follow-up visits including  
39 comprehensive HIV prevention and treatment services described above.  
40  
41  
42  
43  
44  
45  
46  
47  
48

49 Inclusion criteria for our parent randomized trial (ZETRA trial) included: HIV-negative  
50 women, aged 15-24 years, being sexually active and having engaged in any form of  
51 transactional sex at least once in the last three months, agreeing to participate in  
52  
53  
54  
55  
56  
57  
58  
59  
60



intervention sessions and to all study procedures and interviews planned over 18 months of follow-up.

Qualitative sub-study on mobility: Participant groups were purposefully selected as follows in order to access opinions, experiences, perceptions on the research question from a wide range of possible angles:

Table 1: Groups, Topics and Number of participants in Qualitative Study on Mobility, 2019-2020

| GROUP                                                                                                                                                             | TOPICS                                                                                                                                                                                                                                                               | NUMBER                                             |
|-------------------------------------------------------------------------------------------------------------------------------------------------------------------|----------------------------------------------------------------------------------------------------------------------------------------------------------------------------------------------------------------------------------------------------------------------|----------------------------------------------------|
| <ul style="list-style-type: none"> <li>• HIV-positive &amp;</li> <li>• HIV-negative YWHR</li> <li>• Peer educators &amp;</li> <li>• Queen mothers (QM)</li> </ul> | <ul style="list-style-type: none"> <li>• Mobility (reasons, frequency, distance, length of time away, agency)</li> <li>• Agency (level of independence and control over their lives)</li> <li>• Other barriers (employment, health seeking, phone issues)</li> </ul> | 6 HIV positive<br>8 HIV negative<br>8 (3 PE; 4 QM) |
| Male partners of YWHR                                                                                                                                             | Customers perspectives on mobility                                                                                                                                                                                                                                   | 6                                                  |
| Health workers                                                                                                                                                    | Provider perspectives on barriers to retention; possible solutions                                                                                                                                                                                                   | 6                                                  |
| TOTAL                                                                                                                                                             |                                                                                                                                                                                                                                                                      | 34                                                 |

In addition to describing work venues using text, together with a staff member, the participant used Google Maps to point out the location and improve the accuracy of the work venues' latitude and longitude coordinates at two time points to assess change over time. An exploratory analysis using Python and Pandas library was conducted to gain a better understanding of the data aspects such as the main features of the data. Python is a programming language. Pandas stands for "Python Data Analysis Library". This is a useful Python Library that takes data and creates a python object with rows and columns forming data frame that acts very similar to tables in statistical software packages like Excel and SPSS. This was then used to store the data after pre-processing. Finally, descriptive statistics were tabulated.

Community mapping of work venues identified areas sometimes termed 'hot spots' where HIV high-risk youth congregate. Mapping has been dynamic as new 'hotspots'

1  
2  
3 were discovered over time and new information built onto data obtained from  
4  
5 community members and the study field team who have strong relationships with  
6  
7 participant community members over more than 10 years. The interviews, lasting about  
8  
9 one hour, took place in secure and private spaces at the study clinic offices with only  
10  
11 researcher and participant present.  
12  
13  
14  
15

16  
17 All interviewed participants received UgSh 20,000 (USD \$8.00) as compensation for their  
18  
19 transport expenses as is current practice for all other studies at the study clinic.  
20  
21  
22  
23

### 24 **Data collection and analysis**

25  
26 Interviewers were university-trained social scientists and research counsellors, who  
27  
28 conducted in-depth interviews in the local language (Luganda) and had interest in the  
29  
30 research topic. Interviews were recorded and field notes taken. Discussions were held  
31  
32 before and during the study regarding the sensitive (illegal) nature of sex work in Uganda  
33  
34 and how that may affect the research as well as the safety of staff and participants. The  
35  
36 interviewers (three women; one man) had over five years of experience working with high-  
37  
38 risk women and are known and trusted in the participant community.  
39  
40  
41  
42  
43

44  
45 Interview recordings and notes were transcribed and translated into English. Each audio  
46  
47 transcript was quality controlled by the study coordinator who listened to the audio and  
48  
49 read the transcript to add any missing information or correct and mis-typed data in the  
50  
51 transcript. Coding was conducted using the English translation of the transcripts using  
52  
53 NVIVO12 for Mac by two coders based in Uganda with complete knowledge of the context  
54  
55  
56  
57  
58  
59  
60

1  
2  
3 and focused on descriptive thematic coding.<sup>41</sup> Analysis focused on both apriori and  
4  
5 emerging content, identifying the dominant and the range of explanations and  
6  
7 comparisons across clients. Multiple interactive discussions during team meetings were  
8  
9 held with the analysis team and senior researchers to validate data interpretation. The  
10  
11 main codes included in the interview guides included: frequency, distance and reasons  
12  
13 for travel. The codes that emerged during analysis under reasons for mobility included:  
14  
15 lack of education and employment, violence, lack of agency, influence of social networks  
16  
17 and poverty.  
18  
19  
20  
21  
22  
23

### 24 **Patient and Public Involvement**

25  
26 Interaction with patients' in the study was done deliberately from the formative phase  
27  
28 where participants shared their priorities, experiences and preferences which informed  
29  
30 and guided the development of the research questions, measures and intervention.  
31  
32 Patients were not directly involved in the original study design (at proposal writing  
33  
34 phase) but they were directly engaged in recruitment of study participants and gave  
35  
36 significant input into intervention development with regards to content and form. The  
37  
38 current study has benefitted from two community advisory boards, one that was set up  
39  
40 for the clinic at initiation in 2008 and one that was a youth-specific community advisory  
41  
42 board developed for this study. The groups both met every quarter during the study  
43  
44 implementation and provided guidance on both implementation and interpretation of  
45  
46 study results. Two specific additional member-checking exercises were conducted in  
47  
48 January 2021 with data collection staff and study participants. The study has been  
49  
50 approved under the Uganda Virus Research Institute and the Uganda National Council  
51  
52  
53  
54  
55  
56  
57  
58  
59  
60

fo Science and Technology. We have written informed consent for all participants and have, as confirmed by the Uganda National Council of Science and Technology, confirmed all those who are under 18 as "emancipated minors". The UNCST has approved this study under the regulations as such.

## FINDINGS

We recruited 644 YWHR participants for the RCT. All participants were HIV-negative at enrolment. For this sub-study, we conducted 34 qualitative interviews; in addition to the 14 sex workers (six HIV positive, eight HIV negative), six health worker/policy makers, three peer educators, five 'queen mothers' and six male partners were recruited for qualitative interviews. A "Queen mother" is the term used by participants and can roughly translate as a sex work manager. The inclusion criteria for peer educators were: must be a sex worker who was influential in the sex worker community, knew the sex workers within her community (hot spot), has been working within the hot spot for at least a year, knew how to communicate well to participants and study staff. The median age of YWHR sample at baseline was 20.5 years, 46% of whom were 15-19 years old. With regards to educational level, 7% of YWHR had reached A-level or beyond and about half had some primary education.

Table 2: Average Age and Age Range of Qualitative Participants 2019-2020.

| Category          | Average age | Range |
|-------------------|-------------|-------|
| Queen mothers     | 39.8        | 32-53 |
| YWHR HIV negative | 20.5        | 18-24 |
| YWHR HIV positive | 22.5        | 20-24 |
| Male partners     | 36.4        | 34-40 |
| HCWs              | 34.2        | 23-45 |

Nobody refused to be interviewed.

1  
2  
3 By 15 March 2020, of the 236 participants who attended both 12- and 18- month follow-  
4 up visits, 193 (82)% identified different work venues across these time points.  
5  
6  
7  
8  
9

10 Work venues span distances from Sudan, Kenya and Rwanda, rural Uganda and  
11 Kampala. The median distance travelled was five kilometers (km) with an interquartile  
12 range of 4-10 in active Kampala work venues like Makindye and Bwaise, with the clinic  
13 coordinates as reference point. Most (85%) of the movement was within a radius of 15  
14 km from Kampala. 15% of the movements were beyond 15km from Kampala (Figure 1).  
15  
16  
17  
18  
19  
20  
21  
22  
23

24 More older women (20-24 year-olds) travelled farther (greater than 15km) compared to  
25 YWHR aged 15-19 years. Some participants described frequenting up to twelve  
26 workplaces in the previous month. Seven YWHR participants had seroconverted at  
27 their 6-month visit, three at 12 months and three at 18 months.  
28  
29  
30  
31  
32  
33  
34

35 In interviews we asked YWHR (HIV positive and negative), male partners, bar  
36 managers and owners, and “queen mothers” reasons for high mobility. Five basic  
37 themes emerged: lack of education and employment opportunities, violence, lack of  
38 agency, social/sexual/familial networks and poverty (Figure 2).  
39  
40  
41  
42  
43  
44  
45  
46

#### 47 I. Lack of education and employment options leading to mobility

48

49 With little or no education or job training, participants narrated life stories that they  
50 described as ‘failed dreams’. One participant, the tenth child in her family, described her  
51 dream as a young girl of wishing to become a doctor. With insufficient money to  
52  
53  
54  
55  
56  
57  
58  
59  
60

1  
2  
3 continue her education, she had a second dream of hotel management. As this dream  
4 did not materialize, she described survival strategies that included moving from place to  
5 place doing sex work. Changing dreams led to changing locations. Another participant,  
6  
7  
8 the ninth child in her family, recounted her story of deciding to stop school to help her  
9  
10  
11  
12  
13  
14  
15  
16  
17  
18  
19  
20  
21  
22  
23  
24  
25  
26  
27  
28  
29  
30  
31  
32  
33  
34  
35  
36  
37  
38  
39  
40  
41  
42  
43  
44  
45  
46  
47  
48  
49  
50  
51  
52  
53  
54  
55  
56  
57  
58  
59  
60

continue her education, she had a second dream of hotel management. As this dream did not materialize, she described survival strategies that included moving from place to place doing sex work. Changing dreams led to changing locations. Another participant, the ninth child in her family, recounted her story of deciding to stop school to help her parents stop worrying about her school fees. She said: [when teachers], *“chase you from school (meaning force you to leave school due to lack of school fees) and you spend a week at home”* it was very difficult on the whole family. Some YWHR mentioned stealing money as a way to survive without a job and running from one place to another not to be caught by police or by the people they stole from.

*““You go to a club in Wandegaya [a Kampala quarter] and meet a man who gives you 20,000/= [~6 USD] to go and buy beer... It is at that point that you get out of the club and move to another bar... You disappear ... When you go to [another bar] and meet someone who gives you 10,000/= to buy beer, you also leave ... By the end of the day, all you have done is cheat them of their money without much effort” (YWHR, early 20s).*

Some young women noted that there are educated sex workers however but they often work under different circumstances described as escort services that earn more money and are in less dangerous conditions.

## II. Violence between YWHR and customers and between themselves

YWHR described situations where violence was a ‘normal’ part of their lives inflicted by customers neglecting to wear condoms. One YWHR narrating her experiences working on the Ssesse Islands: *“You may ask a man to wear a condom and those are automatic*

1  
2  
3 *punches.*” Other YWHR describe how when regular partners find them in bars  
4  
5 unexpectedly and beat them for that.  
6  
7  
8  
9

10 *You may sometimes be at work and he finds you, “What are you doing here at*  
11 *night?” he asks. He beats you up... You are definitely forced to leave that place*  
12 *because he has embarrassed you before your customers. (YWHR, early 20s)*  
13  
14  
15  
16  
17  
18

19 Physical violence, or the threat of violence, perpetrated by boyfriends, colleagues or  
20  
21 pimps was reported as a reason for frequent mobility; sometimes as a response to what  
22  
23 may have been thought of as wrongdoing:  
24  
25  
26  
27

28 *. . . . when we steal from customers... should he find you, he can box you [Laughs*  
29 *heartedly]... Should he get you, he can beat you up. So, you have to be really*  
30 *witty. Some men have families and they budget how much they are to spend on*  
31 *a prostitute .. say about 5,000/= [~1.30 USD]... you come and take it all, you also*  
32 *take his phone. Should he find you, he can surely beat you up (YWHR, early 20s)*  
33  
34  
35  
36  
37  
38  
39  
40  
41

42 A YWHR, whose parents had both died when she was under 10 years old and who was  
43  
44 raised by her uncle, narrated her experience of leaving that home soon after her parents  
45  
46 died and starting sex work under 15 years old. She described how customers in bars  
47  
48 would often give young women too much alcohol so that they would get very drunk and  
49  
50 then force them to have sex without payment; if the woman refused she would either  
51  
52 have to run or be beaten up. A second YWHR recounted the story of a friend who was  
53  
54  
55  
56  
57  
58  
59  
60

1  
2  
3 sold to an overseas sex worker-dealer and broke her legs when she was thrown off a  
4 balcony.  
5  
6  
7  
8  
9

10 *Sometimes you might even be put in a room with twenty men and you're to sleep*  
11 *with all of them in one night ... (young sex worker, HIV positive, early 20s)*  
12  
13  
14

15  
16  
17 One male partner described that some relationships between YWHR may become  
18 violent. Sex workers themselves discussed how the competition for customers and  
19 jealousy regarding success between them can lead to violence and movement.  
20  
21  
22  
23

24  
25  
26 *They are so violent. They fight too much ...one gets to a point where they cannot*  
27 *live with anyone ... Alcohol and the things they use [other drugs]... fighting also*  
28 *causes them to move ... they are drunk full-time (Male partner)*  
29  
30  
31  
32

33  
34  
35 Drug use, tension and infighting among YWHR and between them and customers were  
36 all reasons for mobility.  
37  
38  
39

### 40 41 42 III. Lack of agency in relation to mobility 43 44

45 Some participants noted that YWHR do not often have full control over their lives and  
46 the movement in their lives. They could be at the mercy of clients, queen mothers,  
47 whomever is providing housing, the police, bar owners or managers. One male partner  
48 noted that some bars bring a group of young women, about ten, on the weekends, take  
49 them back to rural areas on Monday, and bring a new group the following weekend.  
50  
51  
52  
53  
54  
55  
56  
57  
58  
59  
60



1  
2  
3  
4  
5  
6 *“They have to keep on moving because it's not good when the clients get used to*  
7 *their faces... Clients only give good money to fresh faces... With time they go back to*  
8 *the places they've been before. They just keep on rotating (moving)” (Bar owner)*  
9  
10  
11  
12  
13

14 Some young women work under a manager who has control over their mobility; when,  
15 where, how frequently and for how long they work in certain locations. A male partner  
16 described how negotiations take place between the manager and the venue owner  
17 regarding the young women who are brought from rural areas to work in some locations  
18 in Kampala.  
19  
20  
21  
22  
23  
24  
25

26  
27  
28 *It's the boss [the pimp/queen mother] for those [girls]... they go anywhere she tells*  
29 *them to” (Male partner)*  
30  
31  
32  
33  
34

35 In other situations, as sex work is illegal, law enforcement will regulate young women's  
36 movements by coercing money out of them or forcing them to move. Some women  
37 mentioned how during seasons when police may need money, they will harass YWHR;  
38 this will be another reason for their mobility.  
39  
40  
41  
42  
43  
44  
45

46  
47 IV. *Sometimes the police come and search for us and they do not want you there... Like*  
48 *Christmas season...they round you up; we get little money and they want some of it*  
49 *...You run to some place where they do not know you, . . . (YWHR, early 20s).How*  
50  
51 social networks and social support relate to mobility  
52  
53  
54  
55  
56  
57  
58  
59  
60

1  
2  
3 Participants described home environments where there is no emotional, social or  
4 financial support. In some cases, YWHR have had to move from home to home or to  
5 leave school due to the death of parents. These situations can lead to mobility to  
6 escape an unstable or unhealthy setting.  
7  
8  
9  
10  
11  
12  
13

14 *They don't have parents. Some have caretakers who aren't their biological parents;*  
15 *they have faced many social issues. They keep on moving from one place to*  
16 *another ...Their needs are not met... they are out of school... (Health worker, 45*  
17 *years old)*  
18  
19  
20  
21  
22  
23  
24  
25

26 YWHR described how they preferred to stay close to their friends, who may be  
27 emotionally replacing a family network, so that when a friend moves from one place to  
28 another they follow along and go together. One participant also explained how YWHR  
29 count on each other for safety, that they '*have to be there for each other*'. Participants  
30 have also noted that their connections to one another are similar to a business partner  
31 where if a customer requests a quality such as size or beauty, a participant may  
32 connect her associate to that customer. One health worker also mentioned peer  
33 pressure as a factor leading to mobility; 'she might have a colleague in Bwaise who will  
34 convince her to move [there] when they talk to each other'; citing higher payment in  
35 another location.  
36  
37  
38  
39  
40  
41  
42  
43  
44  
45  
46  
47  
48  
49  
50  
51  
52

## 53 V. Poverty leads to mobility

54  
55  
56  
57  
58  
59  
60

1  
2  
3 The overarching reason for why participants constantly move was financial. One  
4 participant mentioned that they travel to different towns to target market days. Other  
5 illustrations of this association included descriptions of accommodations that are daily  
6 rate lodges where one has to leave if she cannot pay for the night. Searching for bars  
7 where they could have loyal or regular, customers, leaving venues that were already  
8 claimed by other sex workers; or going to a place where customers pay higher prices  
9 were all situations connecting poverty and mobility.  
10  
11  
12  
13  
14  
15  
16  
17  
18  
19  
20

21 *The reason we kept leaving, was money. They may be buying sex workers here for*  
22 *5,000/= and elsewhere they are buying them at 10,000/= or 15,000/= (YWHR, early*  
23 *20s)*  
24  
25  
26  
27  
28  
29

30 *The biggest reason we left that place was that there were colleagues that had*  
31 *specific customers and they would tell us to look for **our** customers that were*  
32 *dedicated and attached to us... The reason (for mobility) was to get a new place*  
33 *(YWHR, early 20s)*  
34  
35  
36  
37  
38  
39  
40  
41

42 In addition to the reasons for mobility, we asked about frequency of travel, distances  
43 traveled. The farthest distances travelled included Mombasa, Mauritius, Dubai, Juba  
44 and Canada.  
45  
46  
47  
48  
49

50  
51 Reasons for participants' mobility concentrated around the themes of lack of education  
52 and employment opportunities sometimes related to seasons including the festive  
53  
54  
55  
56  
57  
58  
59  
60

1  
2  
3 season, violence, lack of agency, limited family support/social networks as well as  
4  
5 poverty. Sub-themes and connections between these themes show a complex web of  
6  
7 drivers of mobility potentially leading to high-risk sexual behavior.  
8  
9

## 11 12 **DISCUSSION**

13  
14 Our findings highlight that YWHR in Kampala are highly mobile, with multiple push and  
15  
16 pull factors associated with mobility. We found that participants were far more mobile  
17  
18 than we anticipated, with both greater distances, greater frequency and destinations of  
19  
20 movement.  
21  
22

23  
24 Access to sexual and reproductive health services: Previous studies dating back  
25  
26 to early 2000s, showed that a number of factors were associated with initiating sex work  
27  
28 in Uganda and the region; including low levels of education, broken family systems,  
29  
30 limited job market and low access to sexual and reproductive health services and these  
31  
32 factors are similar to the factors we have found that influence mobility.<sup>42,43</sup> Limited  
33  
34 access to sexual and reproductive health for AGYW is an important factor related to the  
35  
36 high level of unexpected pregnancies among this age group. Maternal mortality is the  
37  
38 second largest cause of death among adolescent girls aged 15–19 globally. Of all  
39  
40 annual births, around 16 million are among girls in this age range; about two million are  
41  
42 among girls under the age of 15.<sup>44</sup> In addition, 41% of young women 20-24-years old  
43  
44 and nearly half of those who experienced sexual violence, were pregnant, the highest  
45  
46 rate in sub-Saharan Africa.<sup>45</sup> With limited education, and very high national  
47  
48 unemployment, many young women have very few options in making enough money to  
49  
50 feed themselves and their children. This of course is exacerbated with the current  
51  
52  
53  
54  
55  
56  
57  
58  
59  
60

1  
2  
3 COVID-19 crisis. Often the constellation of factors leading young women into sex work  
4  
5 are the factors that push them into steady mobility.  
6  
7  
8  
9

10 Violence motivates mobility: Some sex worker studies conducted in sub-Saharan Africa  
11  
12 have highlighted how migration into urban areas to sell sex has resulted in conflicts and  
13  
14 violence with local sex workers.<sup>46</sup> Our participants also described how they often  
15  
16 moved in order not to compete with other women or to find a venue where they could  
17  
18 cultivate loyal clients. Violence and fear of violence has been reported as closely  
19  
20 intertwined with mobility, poverty, substance abuse and risk for HIV in India.<sup>47,48</sup>  
21  
22  
23

24 Intimate partner violence (IPV) is highly associated with risk for HIV and Ugandan  
25  
26 women and female sex workers report extremely high rates of reported IPV (45%-75%  
27  
28 globally).<sup>49,50</sup> 17 Among Ugandan women, 20-24 years old, 40% have experienced  
29  
30 sexual violence.<sup>51,52</sup> In our study, violence was reported as perpetrated by police,  
31  
32 regular and non-regular partners, other sex workers and managers or pimps, and was a  
33  
34 reason for mobility. The reasons were to run from a conflictual or violent situation or  
35  
36 towards a potentially more peaceful situation. Ramesh and colleagues demonstrated  
37  
38 that participants who were more mobile were more likely to report violence and that sex  
39  
40 workers reporting both mobility and violence were more likely to be infected with HIV.<sup>47</sup>  
41  
42  
43 There are many studies globally reporting correlation between violence and increased  
44  
45 risk for HIV.<sup>49</sup> Physical, sexual and psychological violence increase susceptibility to HIV  
46  
47 among women and girls often through a clustering of factors that include poverty,  
48  
49 substance use, social, gender norms that weave into an intractable pattern of higher risk  
50  
51 environment.<sup>49</sup>  
52  
53  
54  
55  
56  
57  
58  
59  
60

1  
2  
3  
4  
5 Relationship between mobility and HIV prevention: The proposed pathways showing  
6 higher mobility associated with HIV risk in other studies demonstrate that female sex  
7 workers who travel more often reported less consistent condom use, have higher STI  
8 symptoms, and greater perceived risk for HIV acquisition even after controlling for  
9 demographic and socio-economic factors including violence.<sup>53,29,54,55</sup> In our study, over  
10 80% of the participants were mobile, and we do note that reasons for mobility are  
11 qualitatively related to high-risk sexual behavior and are strong obstacles for HIV  
12 prevention behavior including consistent adherent condom use and use of PrEP  
13 medication.  
14  
15  
16  
17  
18  
19  
20  
21  
22  
23  
24  
25

26 Limitations and strengths: Our study was not originally powered to statistically measure  
27 the relationship between mobility and STI, HIV or unplanned pregnancy. We noted the  
28 high mobility on assessing the reasons for difficulty in retaining our study participants.  
29 This became a sub-study and we were then able to discuss in-depth the frequency,  
30 distances, reasons and context surrounding our participants' mobility.  
31  
32  
33  
34  
35  
36  
37  
38  
39

40 To improve our understanding of the dynamic and complex nature of movement, sexual  
41 behavior and the relationships between populations and disease transmission, Cassels  
42 et al. proposed a network-dyadic conceptual model to interpret previous studies and  
43 inform the development of services and research.<sup>56</sup> They propose that the transmission  
44 of HIV is dependent on movement and people's behavior which is influenced by the  
45 connecting of local sub-epidemics, and the effects on both sending and receiving  
46 communities.<sup>56</sup> We propose that the intricate, dynamic and complex nature of  
47  
48  
49  
50  
51  
52  
53  
54  
55  
56  
57  
58  
59  
60

1  
2  
3 relationships between both formal and informal sex work, poverty, substance use, family  
4 members, friends/colleagues, and queen mother relationship networks, violence, and  
5 mobility are constantly changing and impacting on each other in different and  
6 convoluted ways. How public health intervention development and implementation  
7 features into the complex interactions of the lives of participants is complex, delicate  
8 and the greater understanding we acquire into how mobility impacts on our ability to  
9 intervene the more effective these interventions will likely become. Study retention  
10 strategies and health care services should be informed by a more comprehensive and  
11 nuanced understanding of the complicated and tenuous lives of participants and  
12 services, and interventions should be tailored to suit mobility patterns. Peers, bar/lodge  
13 managers who have influence on YWHR lives and mobility should be involved in  
14 research activities if retention of YWHR is to be attained. We must build a mindful PrEP  
15 intervention appreciating that our beneficiaries are constantly on the move. This may  
16 look very different from a traditional clinic-based service that expects all clients to come  
17 on a regular basis for follow-up visits. A mobile clinic, conducted within active work  
18 venues, has been piloted to assess its feasibility for reducing the transport burden on  
19 highly mobile participants and increasing retention in care. We have attempted to  
20 understand whether and how mobility influences the effectiveness of HIV prevention  
21 services specifically with YWHR and the utility of identifying appropriate approaches  
22 and methods, inclusive of mobile populations, that are desperately needed at this critical  
23 moment in the HIV epidemic.<sup>27</sup>

### **Figure Legends**

24  
25  
26  
27  
28  
29  
30  
31  
32  
33  
34  
35  
36  
37  
38  
39  
40  
41  
42  
43  
44  
45  
46  
47  
48  
49  
50  
51  
52  
53  
54 **Figure 1:** Mapping data on reported work venues for young sex workers in Kampala  
55  
56  
57  
58  
59  
60

## Figure 2: The Factors influencing mobility among young sex workers in Kampala

### Footnotes

- Contributors: RK (PhD) conceived of the study. EM and DB conducted the geography data analysis and provided input on study design and study procedures. MM, a female research counsellor, participated in data collection. FK, MM and MN oversaw data collection. RK was primarily responsible for qualitative data analysis, with input from JS. RK composed the first draft of the manuscript. All authors provided input and approved of the final submission.
- Funding: This study was supported by the National Institutes of Mental Health (R01MH109337), PI: Rachel King. All authors are independent from the funders and had full access to all of the data. All authors take responsibility for the integrity of the data and accuracy of the data analysis.
- Competing interests: None declared.
- Patient consent for publication: All participants gave written informed consent to participate.
- Ethics approval: This research was approved by the Uganda Virus Research Institute (#GC/127/16/08/527) and the Ugandan National Council for Science and Technology (#HS1886).
- Provenance and peer review: Not commissioned; externally peer reviewed.
- Data availability statement:
  - All data relevant to the study are included in the article

### REFERENCES

1. Idele P, Gillespie A, Porth T, et al. Epidemiology of HIV and AIDS among adolescents: current status, inequities, and data gaps. *J Acquir Immune Defic Syndr*. 2014;66 Suppl 2:S144-153.
2. Stover J, Rosen J, Kasedde S, Idele P, McClure C. The impact and cost of the HIV/AIDS investment framework for adolescents. *J Acquir Immune Defic Syndr*. 2014;66 Suppl 2:S170-175.
3. Busza J, Mtetwa, S., Mapfumo, R., Hanisch, D., Wong-Gruenwald, R., Cowan, F. Underage and underserved: reaching young women who sell sex in Zimbabwe. *AIDS CARE*. 2016;28(S2):14-20.



- 1  
2  
3 4. Hunter M. The materiality of everyday sex: thinking beyond "prostitution". *African*  
4  
5 *Studies*. 2002;61:99-120.  
6
- 7  
8 5. MacPherson EE, Sadalaki J, Njoloma M, et al. Transactional sex and HIV:  
9  
10 understanding the gendered structural drivers of HIV in fishing communities in  
11  
12 Southern Malawi. *J Int AIDS Soc*. 2012;15 Suppl 1:1-9.  
13
- 14  
15 6. Mbonye M, Nakamanya S, Nalukenge W, King R, Vandepitte J, Seeley J. 'It is  
16  
17 like a tomato stall where someone can pick what he likes': structure and practices  
18  
19 of female sex work in Kampala, Uganda. *BMC Public Health*. 2013;13:741.  
20
- 21  
22 7. Miller CL, Bangsberg DR, Tuller DM, et al. Food insecurity and sexual risk in an  
23  
24 HIV endemic community in Uganda. *AIDS Behav*. 2011;15(7):1512-1519.  
25
- 26  
27 8. Wamoyi J, Ranganathan M, Kyegombe N, Stoebenau K. Improving the  
28  
29 measurement of transactional sex in Sub-Saharan Africa: a critical review.  
30  
31 *Journal of Acquired Immune Deficiency Syndromes*. 2019;80(4):367.  
32
- 33  
34 9. Bantebya G, Muhanguzi, FK, Watson, C. *Adolescent girls in the balance:*  
35  
36 *Changes and continuity in social norms and practices around marriage and*  
37  
38 *education in Uganda*. Kampala, Uganda: ODI;2014.  
39
- 40  
41 10. Stoebenau K, Heise L, Wamoyi J, Bobrova N. Revisiting the understanding of  
42  
43 "transactional sex" in sub-Saharan Africa: a review and synthesis of the literature.  
44  
45 *Social Science and Medicine*. 2016;168:186-197.  
46
- 47  
48 11. Baral S, Beyrer C, Muessig K, et al. Burden of HIV among female sex workers in  
49  
50 low-income and middle-income countries: a systematic review and meta-  
51  
52 analysis. *Lancet Infectious Disease*. 2012;12(7):538-549.  
53  
54  
55  
56  
57  
58  
59  
60

- 1  
2  
3 12. Walker D, Pereznieto, P, Bantebya, G, Ochen, E. *Sexual exploitation of*  
4  
5 *adolescent girls in Uganda: The drivers, consequences and responses to the*  
6  
7 *'sugar daddy' phenomenon*. Kampala, Uganda: ODI;2014.
- 8  
9  
10 13. Bakeera-Kitaka S, Nabukeera-Barungi N, Nostlinger C, Addy K, Colebunders R.  
11  
12 Sexual risk reduction needs of adolescents living with HIV in a clinical care  
13  
14 setting. *AIDS Care*. 2008;20(4):426-433.
- 15  
16  
17 14. Lowenthal ED, Bakeera-Kitaka S, Marukutira T, Chapman J, Goldrath K, Ferrand  
18  
19 RA. Perinatally acquired HIV infection in adolescents from sub-Saharan Africa: a  
20  
21 review of emerging challenges. *Lancet Infect Dis*. 2014;14(7):627-639.
- 22  
23  
24 15. MOH. *Uganda AIDS Indicator Survey 2011*. Kampala, Uganda and Calverton,  
25  
26 Maryland, USA2012.
- 27  
28  
29 16. MOH. *The Crane Survey Report*. Kampala, Uganda: MOH;2009.
- 30  
31  
32 17. Hladik W, Baughman AL, Serwadda D, et al. Burden and characteristics of HIV  
33  
34 infection among female sex workers in Kampala, Uganda - a respondent-driven  
35  
36 sampling survey. *BMC Public Health*. 2017;17(1):565.
- 37  
38  
39 18. Vandepitte J, Bukenya J, Weiss HA, et al. HIV and other sexually transmitted  
40  
41 infections in a cohort of women involved in high-risk sexual behavior in Kampala,  
42  
43 Uganda. *Sex Transm Dis*. 2011;38(4):316-323.
- 44  
45  
46 19. Goldenberg S, Silverman J, Engstrom D, Bojorquez-Chapela I, Strathdee S.  
47  
48 "Right Here is the Gateway": Mobility, Sex Work Entry and HIV Risk Along the  
49  
50 Mexico-U.S. Border. *Int Migr*. 2014;52(4):26-40.
- 51  
52  
53  
54  
55  
56  
57  
58  
59  
60

- 1  
2  
3 20. Goldenberg SM, Chettiar J, Simo A, et al. Early sex work initiation independently  
4 elevates odds of HIV infection and police arrest among adult sex workers in a  
5 Canadian setting. *J Acquir Immune Defic Syndr*. 2014;65(1):122-128.  
6  
7  
8  
9  
10 21. Goldenberg SM, Rangel G, Vera A, et al. Exploring the impact of underage sex  
11 work among female sex workers in two Mexico-US border cities. *AIDS Behav*.  
12 2012;16(4):969-981.  
13  
14  
15  
16  
17 22. Odinkova V, Rusakova M, Urada LA, Silverman JG, Raj A. Police sexual  
18 coercion and its association with risky sex work and substance use behaviors  
19 among female sex workers in St. Petersburg and Orenburg, Russia. *Int J Drug*  
20 *Policy*. 2014;25(1):96-104.  
21  
22  
23  
24  
25  
26 23. Rocha-Jimenez T, Brouwer KC, Silverman JG, Morales-Miranda S, Goldenberg  
27 SM. Exploring the Context and Implementation of Public Health Regulations  
28 Governing Sex Work: A Qualitative Study with Migrant Sex Workers in  
29 Guatemala. *J Immigr Minor Health*. 2016.  
30  
31  
32  
33  
34  
35 24. Servin AE, Brouwer KC, Gordon L, et al. Vulnerability Factors and Pathways  
36 Leading to Underage Entry into Sex Work in two Mexican-US Border Cities. *J*  
37 *Appl Res Child*. 2015;6(1).  
38  
39  
40  
41  
42 25. Silverman JG. Adolescent female sex workers: invisibility, violence and HIV. *Arch*  
43 *Dis Child*. 2011;96(5):478-481.  
44  
45  
46  
47 26. Saggurti N, Ravi K. Verma, Hanimi Reddy Modugu, Saumya RamaRao, Ajay  
48 Kumar Singh, Vaishali Sharma Mahendra, Anrudh K. Jain. *Patterns of*  
49 *migration/mobility and HIV risk among female sex workers: Andhra Pradesh*  
50 *Population Council*;2007.  
51  
52  
53  
54  
55  
56  
57  
58  
59  
60

- 1  
2  
3 27. Camlin CS, Cassels S, Seeley J. Bringing population mobility into focus to  
4 achieve HIV prevention goals. *J Int AIDS Soc.* 2018;21 Suppl 4:e25136.  
5  
6
- 7 28. Camlin CS, Akullian A, Neilands TB, et al. Gendered dimensions of population  
8 mobility associated with HIV across three epidemics in rural Eastern Africa.  
9  
10 *Health Place.* 2019;57:339-351.  
11  
12
- 13 29. Kishamawe C, Vissers DC, Urassa M, et al. Mobility and HIV in Tanzanian  
14 couples: both mobile persons and their partners show increased risk. *AIDS.*  
15 2006;20(4):601-608.  
16  
17
- 18 30. McGrath N, Eaton JW, Newell ML, Hosegood V. Migration, sexual behaviour,  
19 and HIV risk: a general population cohort in rural South Africa. *Lancet HIV.*  
20 2015;2(6):e252-259.  
21  
22
- 23 31. Camlin CS, El Ayadi AM, Kwena ZA, et al. High Mobility and HIV Prevalence  
24 Among Female Market Traders in East Africa in 2014. *J Acquir Immune Defic*  
25 *Syindr.* 2017;74(5):e121-e128.  
26  
27
- 28 32. Camlin CS, Akullian A, Neilands TB, et al. Population mobility associated with  
29 higher risk sexual behaviour in eastern African communities participating in a  
30 Universal Testing and Treatment trial. *J Int AIDS Soc.* 2018;21 Suppl 4:e25115.  
31  
32
- 33 33. Hernando V, Alvarez-del Arco D, Alejos B, et al. HIV Infection in Migrant  
34 Populations in the European Union and European Economic Area in 2007-2012:  
35 An Epidemic on the Move. *J Acquir Immune Defic Syindr.* 2015;70(2):204-211.  
36  
37
- 38 34. Cassels S, Camlin CS, Seeley J. One step ahead: timing and sexual networks in  
39 population mobility and HIV prevention and care. *J Int AIDS Soc.* 2018;21 Suppl  
40 4:e25140.  
41  
42  
43  
44  
45  
46  
47  
48  
49  
50  
51  
52  
53  
54  
55  
56  
57  
58  
59  
60

- 1  
2  
3 35. Vandepitte J WH, Bukenya J, Nakubulwa S, Mayanja Y, Matovu G, Kyakuwa  
4 N, Hughs P, Hayes R, Grosskurth, H. Alcohol use, Mycoplasma genitalium and  
5 other STIs associated with HIV incidence among women at high risk in Kampala,  
6 Uganda. *JAIDS*. 2013;62(1)(1):119-126.  
7  
8  
9  
10  
11  
12 36. Vandepitte J, Muller E, Bukenya J, et al. Prevalence and correlates of  
13 Mycoplasma genitalium infection among female sex workers in Kampala,  
14 Uganda. *J Infect Dis*. 2012;205(2):289-296.  
15  
16  
17  
18  
19 37. Vandepitte J WH, Kyakuwa N, Nakubulwa S, Muller E, Buve A, Van der Stuyft P,  
20 Hayes R, Grosskurth, H. Natural history of mycoplasma genitalium infection in a  
21 cohort of female sex workers in Kampala, Uganda. *Sex Transm Dis*.  
22 2013;40(5):422-427.  
23  
24  
25  
26  
27  
28 38. Bukenya J, Vandepitte J, Kwikiriza M, Weiss HA, Hayes R, Grosskurth H.  
29 Condom use among female sex workers in Uganda. *AIDS Care*. 2013;25(6):767-  
30 774.  
31  
32  
33  
34  
35 39. Francis SC, Baisley K, Lees SS, et al. Vaginal practices among women at high  
36 risk of HIV infection in Uganda and Tanzania: recorded behaviour from a daily  
37 pictorial diary. *PLoS One*. 2013;8(3):e59085.  
38  
39  
40  
41  
42 40. Mbonye M, Nalukenge W, Nakamanya S, et al. Gender inequity in the lives of  
43 women involved in sex work in Kampala, Uganda. *J Int AIDS Soc*. 2012;15 Suppl  
44 1:1-9.  
45  
46  
47  
48  
49 41. Boyatzis R. Transforming Qualitative Information: Thematic Analysis and Code  
50 Development. *SAGE Publications, Inc*. 1998.  
51  
52  
53  
54  
55  
56  
57  
58  
59  
60

- 1  
2  
3 42. MOH. *Adolescent Health Policy Guidelines and Service Standards for Uganda*.  
4  
5 *Uganda: MOH*. 2011.  
6  
7  
8 43. MOH. *Adolescent Sexual and Reproductive Health: A Job Aide 2012*. 2012.  
9  
10 44. WHO. Adolescent pregnancy. 2020; [https://www.who.int/newsroom/fact-](https://www.who.int/newsroom/fact-sheets/detail/adolescent-pregnancy)  
11 [sheets/detail/adolescent-pregnancy](https://www.who.int/newsroom/fact-sheets/detail/adolescent-pregnancy). Accessed 08 April 2020.  
12  
13  
14 45. UNFPA. *Adolescents and Young People in Sub-Saharan Africa Opportunities*  
15 *and Challenges*. Johannesburg: UNFPA;2012.  
16  
17  
18 46. Chiyaka T, Mushati P, Hensen B, et al. Reaching young women who sell sex:  
19 Methods and results of social mapping to describe and identify young women for  
20 DREAMS impact evaluation in Zimbabwe. *PLoS One*. 2018;13(3):e0194301.  
21  
22  
23  
24 47. Ramesh S, Ganju D, Mahapatra B, Mishra RM, Saggurti N. Relationship between  
25 mobility, violence and HIV/STI among female sex workers in Andhra Pradesh,  
26 India. *BMC Public Health*. 2012;12:764.  
27  
28  
29  
30  
31  
32 48. Saggurti N, Jain AK, Sebastian MP, et al. Indicators of mobility, socio-economic  
33 vulnerabilities and HIV risk behaviours among mobile female sex workers in  
34 India. *AIDS Behav*. 2012;16(4):952-959.  
35  
36  
37  
38  
39 49. STRIVE. *Addressing the structural drivers of HIV: A STRIVE synthesis* London  
40 School of Hygiene & Tropical Medicine; UK, 2019;2019.  
41  
42  
43  
44 50. Roberts ST, Haberer J, Celum C, et al. Intimate Partner Violence and Adherence  
45 to HIV Pre-exposure Prophylaxis (PrEP) in African Women in HIV Serodiscordant  
46 Relationships: A Prospective Cohort Study. *J Acquir Immune Defic Syndr*.  
47 2016;73(3):313-322.  
48  
49  
50  
51  
52  
53  
54  
55  
56  
57  
58  
59  
60

- 1  
2  
3 51. Amegbor PM, Pascoe L. Variations in Emotional, Sexual, and Physical Intimate  
4 Partner Violence Among Women in Uganda: A Multilevel Analysis. *J Interpers*  
5 *Violence*. 2019:886260519839429.  
6  
7  
8  
9  
10 52. Cabral A, J MB, Ngure K, et al. Intimate Partner Violence and Self-Reported Pre-  
11 exposure Prophylaxis Interruptions Among HIV-Negative Partners in HIV  
12 Serodiscordant Couples in Kenya and Uganda. *J Acquir Immune Defic Syndr*.  
13 2018;77(2):154-159.  
14  
15  
16  
17  
18  
19 53. Saggurti N, Ravi K. Verma, Hanimi Reddy Modugu, Saumya RamaRao, Ajay  
20 Kumar Singh, Vaishali Sharma Mahendra, and, Jain. AK. *Patterns of*  
21 *migration/mobility and HIV risk among female sex workers: Andhra Pradesh*  
22 *2007–08*. New Delhi, India: Population Council.;2008.  
23  
24  
25  
26  
27  
28 54. Saggurti N, Jain, AK., Sebastian, MP., Singh, R., Modugu, HR., Halli, SS.,  
29 Verma, RK. Indicators of Mobility, Socio-Economic Vulnerabilities and HIV Risk  
30 Behaviours Among Mobile Female Sex Workers in India. *AIDS Behav*.  
31 2012;16:952–959.  
32  
33  
34  
35  
36  
37 55. Camlin CS, Hosegood V, Newell ML, McGrath N, Barnighausen T, Snow RC.  
38 Gender, migration and HIV in rural KwaZulu-Natal, South Africa. *PLoS One*.  
39 2010;5(7):e11539.  
40  
41  
42  
43  
44 56. Cassels S, Jenness SM, Khanna AS. Conceptual framework and research  
45 methods for migration and HIV transmission dynamics. *AIDS Behav*.  
46 2014;18(12):2302-2313.  
47  
48  
49  
50  
51  
52  
53  
54  
55  
56  
57  
58  
59  
60

1  
2  
3  
4  
5  
6  
7  
8  
9  
10  
11  
12  
13  
14  
15  
16  
17  
18  
19  
20  
21  
22  
23  
24  
25  
26  
27  
28  
29  
30  
31  
32  
33  
34  
35  
36  
37  
38  
39  
40  
41  
42  
43  
44  
45  
46  
47  
48  
49  
50  
51  
52  
53  
54  
55  
56  
57  
58  
59  
60

For peer review only



Figure 1: Mapping data on reported work venues for young sex workers in Kampala

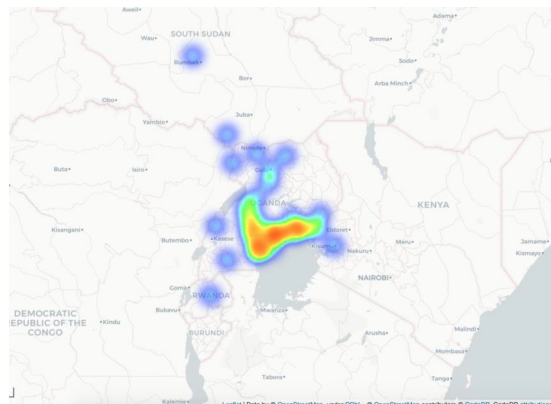

Figure 2: The Factors influencing mobility among young sex workers in Kampala

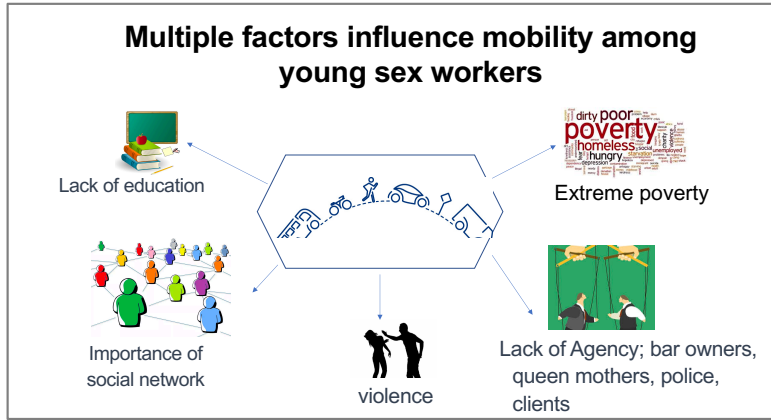

peer review only

## COREQ (Consolidated criteria for REporting Qualitative research) Checklist

A checklist of items that should be included in reports of qualitative research. You must report the page number in your manuscript where you consider each of the items listed in this checklist. If you have not included this information, either revise your manuscript accordingly before submitting or note N/A.

| Topic                                          | Item No. | Guide Questions/Description                                                                                                                              | Reported on Page No. |
|------------------------------------------------|----------|----------------------------------------------------------------------------------------------------------------------------------------------------------|----------------------|
| <b>Domain 1: Research team and reflexivity</b> |          |                                                                                                                                                          |                      |
| <i>Personal characteristics</i>                |          |                                                                                                                                                          |                      |
| Interviewer/facilitator                        | 1        | Which author/s conducted the interview or focus group?                                                                                                   | 18                   |
| Credentials                                    | 2        | What were the researcher's credentials? E.g. PhD, MD                                                                                                     | 6                    |
| Occupation                                     | 3        | What was their occupation at the time of the study?                                                                                                      | 6                    |
| Gender                                         | 4        | Was the researcher male or female?                                                                                                                       | 6                    |
| Experience and training                        | 5        | What experience or training did the researcher have?                                                                                                     | 6                    |
| <i>Relationship with participants</i>          |          |                                                                                                                                                          |                      |
| Relationship established                       | 6        | Was a relationship established prior to study commencement?                                                                                              | 6                    |
| Participant knowledge of the interviewer       | 7        | What did the participants know about the researcher? e.g. personal goals, reasons for doing the research                                                 | 6                    |
| Interviewer characteristics                    | 8        | What characteristics were reported about the interviewer/facilitator? e.g. Bias, assumptions, reasons and interests in the research topic                | 6                    |
| <b>Domain 2: Study design</b>                  |          |                                                                                                                                                          |                      |
| <i>Theoretical framework</i>                   |          |                                                                                                                                                          |                      |
| Methodological orientation and Theory          | 9        | What methodological orientation was stated to underpin the study? e.g. grounded theory, discourse analysis, ethnography, phenomenology, content analysis | 7                    |
| <i>Participant selection</i>                   |          |                                                                                                                                                          |                      |
| Sampling                                       | 10       | How were participants selected? e.g. purposive, convenience, consecutive, snowball                                                                       | 6                    |
| Method of approach                             | 11       | How were participants approached? e.g. face-to-face, telephone, mail, email                                                                              | 6                    |
| Sample size                                    | 12       | How many participants were in the study?                                                                                                                 | 7                    |
| Non-participation                              | 13       | How many people refused to participate or dropped out? Reasons?                                                                                          | 8                    |
| <i>Setting</i>                                 |          |                                                                                                                                                          |                      |
| Setting of data collection                     | 14       | Where was the data collected? e.g. home, clinic, workplace                                                                                               | 6                    |
| Presence of non-participants                   | 15       | Was anyone else present besides the participants and researchers?                                                                                        | 6                    |
| Description of sample                          | 16       | What are the important characteristics of the sample? e.g. demographic data, date                                                                        | 8                    |
| <i>Data collection</i>                         |          |                                                                                                                                                          |                      |
| Interview guide                                | 17       | Were questions, prompts, guides provided by the authors? Was it pilot tested?                                                                            | 5                    |
| Repeat interviews                              | 18       | Were repeat interviews carried out? If yes, how many?                                                                                                    | 8                    |
| Audio/visual recording                         | 19       | Did the research use audio or visual recording to collect the data?                                                                                      | 6                    |
| Field notes                                    | 20       | Were field notes made during and/or after the interview or focus group?                                                                                  | 6                    |
| Duration                                       | 21       | What was the duration of the interviews or focus group?                                                                                                  | 6                    |
| Data saturation                                | 22       | Was data saturation discussed?                                                                                                                           | na                   |
| Transcripts returned                           | 23       | Were transcripts returned to participants for comment and/or                                                                                             | na                   |

| Topic                                  | Item No. | Guide Questions/Description                                                                                                        | Reported on Page No. |
|----------------------------------------|----------|------------------------------------------------------------------------------------------------------------------------------------|----------------------|
|                                        |          | correction?                                                                                                                        |                      |
| <b>Domain 3: analysis and findings</b> |          |                                                                                                                                    |                      |
| <i>Data analysis</i>                   |          |                                                                                                                                    |                      |
| Number of data coders                  | 24       | How many data coders coded the data?                                                                                               | 7                    |
| Description of the coding tree         | 25       | Did authors provide a description of the coding tree?                                                                              | na                   |
| Derivation of themes                   | 26       | Were themes identified in advance or derived from the data?                                                                        | 7                    |
| Software                               | 27       | What software, if applicable, was used to manage the data?                                                                         | 7                    |
| Participant checking                   | 28       | Did participants provide feedback on the findings?                                                                                 | 7                    |
| <i>Reporting</i>                       |          |                                                                                                                                    |                      |
| Quotations presented                   | 29       | Were participant quotations presented to illustrate the themes/findings?<br>Was each quotation identified? e.g. participant number | 8-14                 |
| Data and findings consistent           | 30       | Was there consistency between the data presented and the findings?                                                                 | 15                   |
| Clarity of major themes                | 31       | Were major themes clearly presented in the findings?                                                                               | 15                   |
| Clarity of minor themes                | 32       | Is there a description of diverse cases or discussion of minor themes?                                                             |                      |

Developed from: Tong A, Sainsbury P, Craig J. Consolidated criteria for reporting qualitative research (COREQ): a 32-item checklist for interviews and focus groups. *International Journal for Quality in Health Care*. 2007. Volume 19, Number 6: pp. 349–357

**Once you have completed this checklist, please save a copy and upload it as part of your submission. DO NOT include this checklist as part of the main manuscript document. It must be uploaded as a separate file.**

# BMJ Open

## Mobility Study of Young Women who Exchange Sex for Money or Commodities using Google Maps and Qualitative Methods in Kampala, Uganda

|                                 |                                                                                                                                                                                                                                                                                                                                                                                                                                                                                                                                                                                                                                                                                                                                                                                             |
|---------------------------------|---------------------------------------------------------------------------------------------------------------------------------------------------------------------------------------------------------------------------------------------------------------------------------------------------------------------------------------------------------------------------------------------------------------------------------------------------------------------------------------------------------------------------------------------------------------------------------------------------------------------------------------------------------------------------------------------------------------------------------------------------------------------------------------------|
| Journal:                        | <i>BMJ Open</i>                                                                                                                                                                                                                                                                                                                                                                                                                                                                                                                                                                                                                                                                                                                                                                             |
| Manuscript ID                   | bmjopen-2020-043078.R2                                                                                                                                                                                                                                                                                                                                                                                                                                                                                                                                                                                                                                                                                                                                                                      |
| Article Type:                   | Original research                                                                                                                                                                                                                                                                                                                                                                                                                                                                                                                                                                                                                                                                                                                                                                           |
| Date Submitted by the Author:   | 18-Apr-2021                                                                                                                                                                                                                                                                                                                                                                                                                                                                                                                                                                                                                                                                                                                                                                                 |
| Complete List of Authors:       | King, Rachel; University of California San Francisco, Institute for Global Health Sciences, Department of Medicine<br>Muhanguzi, Eva; University of California San Francisco, Institute for Global Health Sciences, Department of Medicine<br>Nakitto, Miriam; MRC/UVRI and LSHTM Uganda Research Unit, Department of Global Health and Development<br>Mirembe, Miriam; MRC/UVRI and LSHTM Uganda Research Unit, Department of Global Health and Development<br>Kasujja, Francis; MRC/UVRI and LSHTM Uganda Research Unit, Department of Global Health and Development<br>Bagiire, Daniel; MRC/UVRI and LSHTM Uganda Research Unit, Department of Global Health and Development<br>Seeley, Janet; London School of Hygiene and Tropical Medicine, Department of Global Health & Development |
| <b>Primary Subject Heading</b>: | HIV/AIDS                                                                                                                                                                                                                                                                                                                                                                                                                                                                                                                                                                                                                                                                                                                                                                                    |
| Secondary Subject Heading:      | Global health, HIV/AIDS, Qualitative research                                                                                                                                                                                                                                                                                                                                                                                                                                                                                                                                                                                                                                                                                                                                               |
| Keywords:                       | HIV & AIDS < INFECTIOUS DISEASES, PUBLIC HEALTH, QUALITATIVE RESEARCH                                                                                                                                                                                                                                                                                                                                                                                                                                                                                                                                                                                                                                                                                                                       |
|                                 |                                                                                                                                                                                                                                                                                                                                                                                                                                                                                                                                                                                                                                                                                                                                                                                             |

SCHOLARONE™  
Manuscripts



I, the Submitting Author has the right to grant and does grant on behalf of all authors of the Work (as defined in the below author licence), an exclusive licence and/or a non-exclusive licence for contributions from authors who are: i) UK Crown employees; ii) where BMJ has agreed a CC-BY licence shall apply, and/or iii) in accordance with the terms applicable for US Federal Government officers or employees acting as part of their official duties; on a worldwide, perpetual, irrevocable, royalty-free basis to BMJ Publishing Group Ltd ("BMJ") its licensees and where the relevant Journal is co-owned by BMJ to the co-owners of the Journal, to publish the Work in this journal and any other BMJ products and to exploit all rights, as set out in our [licence](#).

The Submitting Author accepts and understands that any supply made under these terms is made by BMJ to the Submitting Author unless you are acting as an employee on behalf of your employer or a postgraduate student of an affiliated institution which is paying any applicable article publishing charge ("APC") for Open Access articles. Where the Submitting Author wishes to make the Work available on an Open Access basis (and intends to pay the relevant APC), the terms of reuse of such Open Access shall be governed by a Creative Commons licence – details of these licences and which [Creative Commons](#) licence will apply to this Work are set out in our licence referred to above.

Other than as permitted in any relevant BMJ Author's Self Archiving Policies, I confirm this Work has not been accepted for publication elsewhere, is not being considered for publication elsewhere and does not duplicate material already published. I confirm all authors consent to publication of this Work and authorise the granting of this licence.

1  
2  
3 **Mobility Study of Young Women who Exchange Sex for Money or Commodities using**  
4 **Google Maps and Qualitative Methods in Kampala, Uganda**  
5  
6  
7

8 Running Head

9 High Mobility Among Young Sex Workers in Uganda  
10  
11

12 Rachel L KING<sup>1,2</sup>, Eva MUHANGUZI<sup>1</sup>, Miriam NAKITTO<sup>2</sup>, Miriam MIREMBE<sup>2</sup>, Francis  
13 KASUJJA<sup>2</sup>, Daniel BAGIIRE<sup>2</sup>, Janet SEELEY<sup>2,3</sup>  
14  
15

16 1 University of California, San Francisco, Institute for Global Health Sciences, Department of  
17 Medicine, San Francisco, CA, USA

18 2 Medical Research Council, Uganda Virus Research Institute, London School of Hygiene and  
19 Tropical Medicine Research Unit, Department of Global Health and Development, Kampala,  
20 Uganda

21 3 London School of Hygiene and Tropical Medicine; Global Health and Development  
22 Department; London, UK  
23

24 Key words: Uganda, sex work, HIV  
25

26 Word count main text: 4637

27 Word count abstract: 274

28 References: 56  
29

30 Funded by National Institutes of Mental Health (NIMH)  
31 R01MH109337  
32  
33

34 Corresponding author:

35 Rachel King

36 Email: [Rachel.King@UCSF.EDU](mailto:Rachel.King@UCSF.EDU)

37 Tel: +256785304516  
38  
39  
40  
41  
42  
43  
44  
45  
46  
47  
48  
49  
50  
51  
52  
53  
54  
55  
56  
57  
58  
59  
60

**ABSTRACT****Objectives:**

We aimed to assess mobility patterns and reasons for high mobility amongst young women engaged in sex work within a randomized controlled trial to gauge how mobility may hinder access to health services and enhance HIV risk in a highly vulnerable population.

**Setting:**

Participants were recruited from a clinic in Kampala, Uganda set up for women at high risk of HIV infection.

**Participants:**

Adolescent girls and young women engaged in sex for money and/or commodities are at particular risk in countries with high HIV prevalence and high fertility rates. High mobility increases exposure to HIV risk. Women participants were eligible for the parent study if 15-24 years-old, HIV-negative and engaged in sex work. For this sub-study, 34 qualitative interviews were held with 14 sex workers (six HIV positive, eight HIV negative), six health worker/policy makers, three peer educators, five 'queen mothers' and six male partners were recruited for qualitative interviews.

**Measures:** Participants used Google maps to identify work-venues at 12 and 18 month study visits. We also conducted 34 interviews on mobility with: high-risk women, male partners, health workers and sex-worker managers. Topics included: distance, frequency and reasons for mobility. We used Python software to analyze mapping data.

**Results:**

Interviews found in depth narratives describing lack of education and employment opportunities, violence, lack of agency, social, sexual and familial support networks and poverty as a complex web of reasons for high mobility among young sex workers.

**Conclusions:**

Young women at high risk are highly mobile. Reasons for mobility impact access and retention to health services and research activities. Strategies to improve retention to care should be cognizant and tailored to suit mobility patterns.



### Strengths and limitations of this study

- This study investigates behavior of one of the most vulnerable populations to HIV, sexually transmitted infections (STI) and unwanted pregnancy in sub-Saharan Africa; young sex workers aged 15-24 years old.
- This study illuminates detailed factors that motivate young sex worker mobility over time and the potential relationships between mobility and high-risk sexual behavior
- This study employed both qualitative and a mapping methodology using Google maps to explore participants' own descriptions of distance, frequency and reasons for mobility as well as mapped locations that highlight very high levels of mobility giving insight into options to inform better suited intervention
- The data gathered here are highly contextual and specific to the study population and environment; the findings may not translate to other regions of sub-Saharan Africa or elsewhere
- In this analysis, we have not combined the STI results with the mobility data

### INTRODUCTION

Adolescent girls and young women engaged in sex in exchange for money and/or commodities are at particular risk in countries with high HIV prevalence and high fertility rates.<sup>1-3</sup> Young women may differentiate between commercial and transactional sex work based on stigma or relationship status.<sup>4,5</sup> In some cases, sex work is the only source of family income, and in others, women use transactional sex to supplement income.<sup>6</sup> Transactional sex may thus be situational or temporary, and associated with acute shortfalls in cash, need for school fees or food insecurity.<sup>7,8</sup> Sex work is often socially stigmatizing<sup>9</sup> whereas informal transactional sex may be socially accepted in some, situations, or contexts.<sup>10</sup> Globally, female sex workers (FSW) of all ages are over 10 times more likely to be living with HIV than women in the general population.<sup>11</sup> In sub-Saharan Africa in 2012, the average HIV prevalence among FSW was greater than 35%,<sup>11</sup> with 20-40% of FSW entering sex work as adolescents with a mean age of entry of 16 years or younger.

1  
2  
3 In Uganda, about 12% of adolescent girls and young women report transactional sex,<sup>12-</sup>  
4  
5  
6 <sup>14</sup> Young people in Uganda have an HIV prevalence of 3.7% nationally, yet younger  
7  
8 female sex workers have about a four to seven times higher prevalence of HIV,<sup>15 16</sup>  
9  
10 with female sex workers over 15 years old in Kampala reported to have between 33%-  
11  
12 37% HIV infection.<sup>17,18</sup> In addition, female sex workers under 16 years old, new to sex  
13  
14 work are dramatically more vulnerable than older colleagues to violence, STIs and HIV  
15  
16 and poorer access to services.<sup>19-25</sup> Yet, despite rising numbers of young female sex  
17  
18 workers and their recognized vulnerability, there have been few interventions to date  
19  
20 that have targeted this group.<sup>3,25</sup>  
21  
22  
23  
24  
25

26 Studies in India have found that sex-work-related mobility is often undertaken to  
27  
28 maximize trade opportunity.<sup>26</sup> In East Africa, research around mobility has highlighted  
29  
30 that mobility both short and longer -term was associated with higher-risk sexual behavior, and is  
31  
32 strongly associated with gender: the HIV risks associated with mobility are more prominent for  
33  
34 women than for men.<sup>27</sup>  
35  
36  
37  
38  
39

40 High mobility increases young female sex workers exposure to risk.<sup>27,28</sup> Mobility can  
41  
42 place people in situations that increase their risk of acquiring STIs, HIV and other  
43  
44 infections. <sup>28-31</sup> Studies have reported that mobility is associated with concurrent sexual  
45  
46 partners which further increases risk to HIV and other STIs.<sup>32</sup> Studies from Europe have  
47  
48 shown that migrants diagnosed with HIV are more likely to present late for treatment  
49  
50 and care than nationals.<sup>33</sup> Settling into a new place also presents challenges and  
51  
52 instability affecting finding food and medical care<sup>34</sup>; these include irregular housing  
53  
54  
55  
56  
57  
58  
59  
60

1  
2  
3 status, language and cultural barriers, cost of services, a lack of youth-inclusive health  
4 policies and accessible services.<sup>27</sup> In this paper, we report patterns of, and reasons for,  
5 young women at higher risk (YWHR) mobility and the potential links between mobility  
6 and HIV risk among YWHR participating in a randomized controlled trial (RCT) that  
7 aims to assess the effectiveness of a cognitive behavioral and structural HIV prevention  
8 intervention (the ZETRA trial) on reducing the frequency of unprotected sex in Kampala,  
9 Uganda.

## 23 **METHODS**

### 24 **Setting:**

25  
26  
27  
28  
29 This study was based within the Good Health for Women Project clinic in Kampala,  
30 Uganda. This clinic was an independent clinic established in 2008 to provide HIV and  
31 other STI prevention, care and treatment to FSW, their partners and their children in a  
32 safe location. Since inception, the clinic has been a site for conducting research on the  
33 context and underlying factors of HIV risk.<sup>6,18,35-40</sup> The clinic offered routine HIV  
34 counselling and testing, syndromic management of sexually transmitted infections,  
35 family planning, antenatal care, free condoms, risk reduction counselling, counselling for  
36 excessive alcohol use, tuberculosis screening and treatment, ART and co-  
37 trimoxazole/dapsone preventive therapy. Enrolled women attended quarterly visits for  
38 HIV prevention and treatment services and study visits every six months. This clinic  
39 generally saw about 50 sex workers per day during the time of the study. To protect the  
40 confidentiality and safety of participants, it was located in an accessible area of central  
41  
42  
43  
44  
45  
46  
47  
48  
49  
50  
51  
52  
53  
54  
55  
56  
57  
58  
59  
60

1  
2  
3 Kampala not identifiable to the general public as a place frequented specifically by  
4  
5 participants at high risk of HIV infection.  
6  
7  
8  
9

## 10 **Procedures:**

### 11 **Mapping of work venues**

12  
13  
14 The first aim of this sub-study was to explore the dynamics of the social and sexual  
15 networks, mobility and context of YWHR in Kampala. Work venues of our randomized  
16 controlled trial participants have been mapped in two ways: qualitative and quantitative  
17 data collection using key informant interviews of four categories of participants in urban  
18 Kampala: YWHR, peer educators, sex worker managers and male partners. In-depth  
19 interviews of YWHR study participants explored where, why, how, when, how frequently  
20 and for how long they move using interview guides.  
21  
22  
23  
24  
25  
26  
27  
28  
29

### 30 **Participant enrolment**

31  
32  
33 Randomized parent study. Participants were recruited from a specialized clinic in  
34 Kampala called the “Good Health for Women Project” clinic described above. Women  
35 were recruited for this clinic by field workers who conducted mobilization activities with  
36 community peer sex worker-leaders to identify sex workers from commercial hotspots  
37 who were then enrolled at the clinic irrespective of HIV status as has been described by  
38 Vandepitte et al. All enrolled women attended quarterly follow-up visits including  
39 comprehensive HIV prevention and treatment services described above.  
40  
41  
42  
43  
44  
45  
46  
47  
48

49 Inclusion criteria for our parent randomized trial (ZETRA trial) included: HIV-negative  
50 women, aged 15-24 years, being sexually active and having engaged in any form of  
51 transactional sex at least once in the last three months, agreeing to participate in  
52  
53  
54  
55  
56  
57  
58  
59  
60

intervention sessions and to all study procedures and interviews planned over 18 months of follow-up.

Qualitative sub-study on mobility: Participant groups were purposefully selected in order to access opinions, experiences, perceptions on the research questions around mobility from a wide range of possible angles (see Table 1).

Table 1: Groups, Topics and Number of participants in Qualitative Study on Mobility, 2019-2020

| GROUP                                                                                                                                                             | TOPICS                                                                                                                                                                                                                                                               | NUMBER                                             |
|-------------------------------------------------------------------------------------------------------------------------------------------------------------------|----------------------------------------------------------------------------------------------------------------------------------------------------------------------------------------------------------------------------------------------------------------------|----------------------------------------------------|
| <ul style="list-style-type: none"> <li>• HIV-positive &amp;</li> <li>• HIV-negative YWHR</li> <li>• Peer educators &amp;</li> <li>• Queen mothers (QM)</li> </ul> | <ul style="list-style-type: none"> <li>• Mobility (reasons, frequency, distance, length of time away, agency)</li> <li>• Agency (level of independence and control over their lives)</li> <li>• Other barriers (employment, health seeking, phone issues)</li> </ul> | 6 HIV positive<br>8 HIV negative<br>8 (3 PE; 4 QM) |
| Male partners of YWHR                                                                                                                                             | Customers perspectives on mobility                                                                                                                                                                                                                                   | 6                                                  |
| Health workers                                                                                                                                                    | Provider perspectives on barriers to retention; possible solutions                                                                                                                                                                                                   | 6                                                  |
| TOTAL                                                                                                                                                             |                                                                                                                                                                                                                                                                      | 34                                                 |

In addition to describing work venues using text, together with a staff member, the participants used Google Maps to point out the location and improve the accuracy of the work venues' latitude and longitude coordinates at two time points to assess change over time. An exploratory analysis using Python and Pandas library was conducted to gain a better understanding of the data aspects such as the main features of the data. Python is a programming language. Pandas stands for "Python Data Analysis Library". It takes data and creates a python object with rows and columns forming a data frame that acts very similar to tables in statistical software packages like Excel and SPSS. This was then used to store the data after pre-processing. Finally, descriptive statistics were tabulated.

Community mapping of work venues identified areas sometimes termed 'hot spots' where HIV high-risk youth congregate. Mapping was dynamic as new 'hotspots' were

1  
2  
3 discovered over time and new information built onto data obtained from community  
4 members and the study field team who had strong relationships with participant  
5 community members over more than 10 years. The interviews, lasting about one hour,  
6 took place in secure and private spaces at the study clinic offices with only researcher  
7 and participant present.  
8  
9  
10  
11  
12  
13  
14  
15  
16

17 All interviewed participants received UgSh 20,000 (USD \$8.00) as compensation for their  
18 transport expenses as is current practice for all other studies at the study clinic.  
19  
20  
21  
22  
23

### 24 **Data collection and analysis**

25  
26 Interviewers were university-trained social scientists and research counsellors, who  
27 conducted in-depth interviews in the local language (Luganda) and had interest in the  
28 research topic. Interviews were recorded and field notes taken. Discussions were held  
29 before and during the study regarding the sensitive (illegal) nature of sex work in Uganda  
30 and how that may affect the research as well as the safety of staff and participants. The  
31 interviewers (three women; one man) had over five years of experience working with high-  
32 risk women and are known and trusted in the participant community.  
33  
34  
35  
36  
37  
38  
39  
40  
41  
42  
43

44 Interview recordings and notes were transcribed and translated into English. Each audio  
45 transcript was quality controlled by the study coordinator who listened to the audio and  
46 read the transcript to add any missing information or correct and mis-typed data in the  
47 transcript. Coding was conducted using the English translation of the transcripts using  
48 NVIVO12 for Mac by two coders based in Uganda with complete knowledge of the context  
49  
50  
51  
52  
53  
54  
55  
56  
57  
58  
59  
60

1  
2  
3 and focused on descriptive thematic coding.<sup>41</sup> Analysis focused on both apriori and  
4  
5 emerging content, identifying the dominant and the range of explanations and  
6  
7 comparisons across clients. Multiple interactive discussions during team meetings were  
8  
9 held with the analysis team and senior researchers to validate data interpretation. The  
10  
11 main codes included in the interview guides included: frequency, distance and reasons  
12  
13 for travel. The codes that emerged during analysis under reasons for mobility included:  
14  
15 lack of education and employment, violence, lack of agency, influence of social networks  
16  
17 and poverty.  
18  
19  
20  
21  
22  
23

### 24 **Patient and Public Involvement**

25  
26 Interaction with patients' in the study was done deliberately from the formative phase  
27  
28 where participants shared their priorities, experiences and preferences which informed  
29  
30 and guided the development of the research questions, measures and intervention.  
31  
32 Patients were not directly involved in the original study design (at proposal writing  
33  
34 phase) but they were directly engaged in recruitment of study participants and gave  
35  
36 significant input into intervention development with regards to content and form. The  
37  
38 current study has benefitted from two community advisory boards, one that was set up  
39  
40 for the clinic at initiation in 2008 and one that was a youth-specific community advisory  
41  
42 board developed for this study. The groups both met every quarter during the study  
43  
44 implementation and provided guidance on both implementation and interpretation of  
45  
46 study results. Two specific additional member-checking exercises were conducted in  
47  
48 January 2021 with data collection staff and study participants. The study was approved  
49  
50 under the Uganda Virus Research Institute and the Uganda National Council for  
51  
52  
53  
54  
55  
56  
57  
58  
59  
60

1  
2  
3 Science and Technology. We have written informed consent for all participants and  
4  
5 have, as confirmed by the Uganda National Council of Science and Technology,  
6  
7 confirmed all those who are under 18 as "emancipated minors". The UNCST has  
8  
9 approved this study under the regulations as such.  
10

## 11 12 **FINDINGS**

13  
14 We recruited 644 YWHR participants for the parent RCT. All participants were HIV-  
15  
16 negative at enrolment. For this sub-study, we conducted 34 qualitative interviews; in  
17  
18 addition to the 14 sex workers (six HIV positive, eight HIV negative), six health  
19  
20 worker/policy makers, three peer educators, five '*queen mothers*' and six male partners  
21  
22 were recruited for qualitative interviews. A "Queen mother" is the term used by  
23  
24 participants and can roughly translate as a sex work manager. The inclusion criteria for  
25  
26 peer educators were: must be a sex worker who was influential in the sex worker  
27  
28 community, knew the sex workers within her community (hot spot), has been working  
29  
30 within the hot spot for at least a year, knew how to communicate well to participants and  
31  
32 study staff. The median age of YWHR sample at baseline was 20.5 years, 46% of  
33  
34 whom were 15-19 years old. With regards to educational level, 7% of YWHR had  
35  
36 reached A-level or beyond and about half had some primary education (see Table 2).  
37  
38  
39  
40  
41

42 Table 2: Average Age and Age Range of Qualitative Participants 2019-2020.  
43  
44  
45

| 46 <b>Category</b>   | 47 <b>Average age</b> | 48 <b>Range</b> |
|----------------------|-----------------------|-----------------|
| 49 Queen mothers     | 39.8                  | 32-53           |
| 50 YWHR HIV negative | 20.5                  | 18-24           |
| 51 YWHR HIV positive | 22.5                  | 20-24           |
| 52 Male partners     | 36.4                  | 34-40           |
| 53 HCWs              | 34.2                  | 23-45           |

54 Nobody refused to be interviewed.  
55  
56  
57  
58  
59  
60



1  
2  
3 By 15 March 2020, of the 236 participants who attended both 12- and 18- month follow-  
4 up visits, 193 (82)% identified different work venues across these time points.  
5  
6  
7  
8  
9

10 Work venues span distances from Sudan, Kenya and Rwanda, rural Uganda and  
11 Kampala. The median distance travelled was five kilometers (km) with an interquartile  
12 range of 4-10 in active Kampala work venues like Makindye and Bwaise, with the clinic  
13 coordinates as reference point. Most (85%) of the movement was within a radius of 15  
14 km from Kampala. 15% of the movements were beyond 15km from Kampala (Figure 1).  
15  
16  
17  
18  
19  
20  
21  
22  
23

24 More older women (20-24 year-olds) travelled farther (greater than 15km) compared to  
25 YWHR aged 15-19 years. Some participants described frequenting up to twelve  
26 workplaces in the previous month. Seven YWHR participants had seroconverted at  
27 their 6-month visit, three at 12 months and three at 18 months.  
28  
29  
30  
31  
32  
33  
34

35 In interviews we asked YWHR (HIV positive and negative), male partners, bar  
36 managers and owners, and “queen mothers” reasons for high mobility. Five basic  
37 themes emerged: lack of education and employment opportunities, violence, lack of  
38 agency, social/sexual/familial networks and poverty (Figure 2).  
39  
40  
41  
42  
43  
44  
45  
46

#### 47 I. Lack of education and employment options leading to mobility

48

49 With little or no education or job training, participants narrated life stories that they  
50 described as ‘failed dreams’. One participant, the tenth child in her family, described her  
51 dream as a young girl of wishing to become a doctor. With insufficient money to  
52  
53  
54  
55  
56  
57  
58  
59  
60

1  
2  
3 continue her education, she had a second dream of hotel management. As this dream  
4 did not materialize, she described survival strategies that included moving from place to  
5 place performing sex work. Changing dreams led to changing locations. Another  
6  
7  
8 participant, the ninth child in her family, recounted her story of deciding to quit school to  
9  
10 help her parents stop worrying about her school fees. She said: [when teachers],  
11  
12 “chase you from school (meaning force you to leave school due to lack of school fees)  
13  
14 and you spend a week at home” it was very difficult on the whole family. Some YWHR  
15  
16 mentioned stealing money as a way to survive without a job and running from one place  
17  
18 to another not to be caught by police or by the people they stole from.  
19  
20  
21  
22  
23  
24  
25

26 *““You go to a club in Wandegaya [a Kampala quarter] and meet a man who gives you*  
27  
28 *20,000/= [~6 USD] to go and buy beer... It is at that point that you get out of the club*  
29  
30 *and move to another bar... You disappear ... When you go to [another bar] and meet*  
31  
32 *someone who gives you 10,000/= to buy beer, you also leave ... By the end of the*  
33  
34 *day, all you have done is cheat them of their money without much effort” (YWHR,*  
35  
36 *early 20s).*  
37  
38  
39

40 Some young women noted that there are educated sex workers, however but they often  
41  
42 work under different circumstances described as escort services that earn more money  
43  
44 and are in less dangerous conditions.  
45

## 46 II. Violence between YWHR and customers and between themselves

47  
48

49 YWHR described situations where violence was a ‘normal’ part of their lives inflicted by  
50  
51 customers neglecting to wear condoms. One YWHR narrating her experiences working  
52  
53 on the Ssesse Islands: “You may ask a man to wear a condom and those are automatic  
54  
55  
56  
57  
58  
59  
60

1  
2  
3 *punches.*” Other YWHR describe how when regular partners find them in bars  
4  
5 unexpectedly and beat them for that.  
6  
7  
8  
9

10 *You may sometimes be at work and he finds you, “What are you doing here at*  
11 *night?” he asks. He beats you up... You are definitely forced to leave that place*  
12 *because he has embarrassed you before your customers. (YWHR, early 20s)*  
13  
14  
15  
16  
17  
18

19 Physical violence, or the threat of violence, perpetrated by boyfriends, colleagues or  
20  
21 pimps was reported as a reason for frequent mobility; sometimes as a response to what  
22  
23 may have been thought of as wrongdoing:  
24  
25  
26  
27  
28

29 *. . . . when we steal from customers... should he find you, he can box you [Laughs*  
30 *heartedly]... Should he get you, he can beat you up. So, you have to be really*  
31 *witty. Some men have families and they budget how much they are to spend on*  
32 *a prostitute .. say about 5,000/= [~1.30 USD]... you come and take it all, you also*  
33 *take his phone. Should he find you, he can surely beat you up (YWHR, early 20s)*  
34  
35  
36  
37  
38  
39  
40  
41

42 A YWHR, whose parents had both died when she was under 10 years old and who was  
43  
44 raised by her uncle, narrated her experience of leaving that home soon after her parents  
45  
46 died and starting sex work under 15 years old. She described how customers in bars  
47  
48 would often give young women too much alcohol so that they would get very drunk and  
49  
50 then force them to have sex without payment; if the woman refused, she would either  
51  
52 have to run or be beaten up. A second YWHR recounted the story of a friend who was  
53  
54  
55  
56  
57  
58  
59  
60

1  
2  
3 sold to an overseas sex worker-dealer and broke her legs when she was thrown off a  
4 balcony.  
5  
6  
7  
8  
9

10 *Sometimes you might even be put in a room with twenty men and you're to sleep*  
11 *with all of them in one night ... (young sex worker, HIV positive, early 20s)*  
12  
13  
14

15  
16  
17 One male partner described that some relationships between YWHR may become  
18 violent. Sex workers themselves discussed how the competition for customers and  
19 jealousy regarding success between them can lead to violence and movement.  
20  
21  
22  
23

24  
25  
26 *They are so violent. They fight too much ...one gets to a point where they cannot*  
27 *live with anyone ... Alcohol and the things they use [other drugs]... fighting also*  
28 *causes them to move ... they are drunk full-time (Male partner)*  
29  
30  
31  
32

33  
34  
35 Drug use, tension and infighting among YWHR and between them and customers were  
36 all reasons for mobility.  
37  
38  
39

### 40 41 42 III. Lack of agency in relation to mobility 43 44

45 Some participants noted that YWHR do not often have full control over their lives and  
46 the movement in their lives. They could be at the mercy of clients, queen mothers,  
47 whomever is providing housing, the police, bar owners or managers. One male partner  
48 noted that some bars bring a group of young women, about ten, on the weekends, take  
49 them back to rural areas on Monday, and bring a new group the following weekend.  
50  
51  
52  
53  
54  
55  
56  
57  
58  
59  
60

1  
2  
3  
4  
5  
6 *“They have to keep on moving because it's not good when the clients get used to*  
7 *their faces... Clients only give good money to fresh faces... With time they go back to*  
8 *the places they've been before. They just keep on rotating (moving)” (Bar owner)*  
9  
10  
11  
12  
13

14 Some young women work under a manager who has control over their mobility; when,  
15 where, how frequently and for how long they work in certain locations. A male partner  
16 described how negotiations take place between the manager and the venue owner  
17 regarding the young women who are brought from rural areas to work in some locations  
18 in Kampala.  
19  
20  
21  
22  
23  
24  
25

26  
27  
28 *It's the boss [the pimp/queen mother] for those [girls]... they go anywhere she tells*  
29 *them to” (Male partner)*  
30  
31  
32  
33  
34

35 In other situations, as sex work is illegal, law enforcement will regulate young women's  
36 movements by coercing money out of them or forcing them to move. Some women  
37 mentioned how during seasons when police may need money, they will harass YWHR;  
38 this will be another reason for their mobility.  
39  
40  
41  
42  
43  
44  
45

46  
47 *Sometimes the police come and search for us and they do not want you there... Like*  
48 *Christmas season...they round you up; we get little money and they want some of it*  
49 *...You run to some place where they do not know you, . . . (YWHR, early 20s).How*  
50  
51  
52  
53  
54 social networks and social support relate to mobility  
55  
56  
57  
58  
59  
60

1  
2  
3 Participants described home environments where there is no emotional, social or  
4 financial support. In some cases, YWHR have had to move from home to home or to  
5 leave school due to the death of parents. These situations can lead to mobility to  
6 escape an unstable or unhealthy setting.  
7  
8  
9  
10  
11  
12  
13

14 *They don't have parents. Some have caretakers who aren't their biological parents;*  
15 *they have faced many social issues. They keep on moving from one place to*  
16 *another ...Their needs are not met... they are out of school... (Health worker, 45*  
17 *years old)*  
18  
19  
20  
21  
22  
23  
24  
25

26 YWHR described how they preferred to stay close to their friends, who may be  
27 emotionally replacing a family network, so that when a friend moves from one place to  
28 another they follow along and go together. One participant also explained how YWHR  
29 count on each other for safety, that they '*have to be there for each other*'. Participants  
30 have also noted that their connections to one another are similar to a business partner  
31 where if a customer requests a quality such as size or beauty, a participant may  
32 connect her associate to that customer. One health worker also mentioned peer  
33 pressure as a factor leading to mobility; 'she might have a colleague in Bwaise who will  
34 convince her to move [there] when they talk to each other'; citing higher payment in  
35 another location.  
36  
37  
38  
39  
40  
41  
42  
43  
44  
45  
46  
47  
48  
49  
50  
51  
52

#### 53 IV. Poverty leads to mobility 54 55 56 57 58 59 60

1  
2  
3 The overarching reason for why participants constantly move was financial. One  
4 participant mentioned that they travel to different towns to target market days. Other  
5 illustrations of this association included descriptions of accommodations that are daily  
6 rate lodges where one has to leave if she cannot pay for the night. Searching for bars  
7 where they could have loyal or regular, customers, leaving venues that were already  
8 claimed by other sex workers; or going to a place where customers pay higher prices  
9 were all situations connecting poverty and mobility.  
10  
11  
12  
13  
14  
15  
16  
17  
18  
19  
20

21 *The reason we kept leaving, was money. They may be buying sex workers here for*  
22 *5,000/= and elsewhere they are buying them at 10,000/= or 15,000/= (YWHR, early*  
23 *20s)*  
24  
25  
26  
27  
28  
29

30 *The biggest reason we left that place was that there were colleagues that had*  
31 *specific customers and they would tell us to look for **our** customers that were*  
32 *dedicated and attached to us... The reason (for mobility) was to get a new place*  
33 *(YWHR, early 20s)*  
34  
35  
36  
37  
38  
39  
40  
41

42 In addition to the reasons for mobility, we asked about frequency of travel, distances  
43 traveled. The farthest distances travelled included Mombasa, Mauritius, Dubai, Juba  
44 and Canada.  
45  
46  
47  
48  
49

50  
51 Reasons for participants' mobility concentrated around the themes of lack of education  
52 and employment opportunities sometimes related to seasons including the festive  
53  
54  
55  
56  
57  
58  
59  
60

1  
2  
3 season, violence, lack of agency, limited family support/social networks as well as  
4  
5 poverty. Sub-themes and connections between these themes show a complex web of  
6  
7 drivers of mobility potentially leading to high-risk sexual behavior.  
8  
9

## 11 12 **DISCUSSION**

13  
14 Our findings highlight that YWHR in Kampala are highly mobile, with multiple push and  
15  
16 pull factors associated with mobility. We found that participants were far more mobile  
17  
18 than we anticipated, with both greater distances, greater frequency and destinations of  
19  
20 movement.  
21  
22

23  
24 Access to sexual and reproductive health services: Previous studies dating back  
25  
26 to early 2000s, showed that a number of factors were associated with initiating sex work  
27  
28 in Uganda and the region; including low levels of education, broken family systems,  
29  
30 limited job market and low access to sexual and reproductive health services and these  
31  
32 factors are similar to the factors we have found that influence mobility.<sup>42,43</sup> Limited  
33  
34 access to sexual and reproductive health for AGYW is an important factor related to the  
35  
36 high level of unexpected pregnancies among this age group. Maternal mortality is the  
37  
38 second largest cause of death among adolescent girls aged 15–19 globally. Of all  
39  
40 annual births, around 16 million are among girls in this age range; about two million are  
41  
42 among girls under the age of 15.<sup>44</sup> In addition, 41% of young women 20-24-years old  
43  
44 and nearly half of those who experienced sexual violence, were pregnant, the highest  
45  
46 rate in sub-Saharan Africa.<sup>45</sup> With limited education, and very high national  
47  
48 unemployment, many young women have very few options in making enough money to  
49  
50 feed themselves and their children. This of course is exacerbated with the current  
51  
52  
53  
54  
55  
56  
57  
58  
59  
60



1  
2  
3 COVID-19 crisis. Often the constellation of factors leading young women into sex work  
4  
5 are the factors that push them into steady mobility.  
6  
7  
8  
9

10 Violence motivates mobility: Some sex worker studies conducted in sub-Saharan Africa  
11  
12 have highlighted how migration into urban areas to sell sex has resulted in conflicts and  
13  
14 violence with local sex workers.<sup>46</sup> Our participants also described how they often  
15  
16 moved in order not to compete with other women or to find a venue where they could  
17  
18 cultivate loyal clients. Violence and fear of violence has been reported as closely  
19  
20 intertwined with mobility, poverty, substance abuse and risk for HIV in India.<sup>47,48</sup>  
21  
22  
23

24 Intimate partner violence (IPV) is highly associated with risk for HIV and Ugandan  
25  
26 women and female sex workers report extremely high rates of reported IPV (45%-75%  
27  
28 globally).<sup>49,50</sup> 17 Among Ugandan women, 20-24 years old, 40% have experienced  
29  
30 sexual violence.<sup>51,52</sup> In our study, violence was reported as perpetrated by police,  
31  
32 regular and non-regular partners, other sex workers and managers or pimps, and was a  
33  
34 reason for mobility. The reasons were to run from a conflictual or violent situation or  
35  
36 towards a potentially more peaceful situation. Ramesh and colleagues demonstrated  
37  
38 that participants who were more mobile were more likely to report violence and that sex  
39  
40 workers reporting both mobility and violence were more likely to be infected with HIV.<sup>47</sup>  
41  
42  
43 There are many studies globally reporting correlation between violence and increased  
44  
45 risk for HIV.<sup>49</sup> Physical, sexual and psychological violence increase susceptibility to HIV  
46  
47 among women and girls often through a clustering of factors that include poverty,  
48  
49 substance use, social, gender norms that weave into an intractable pattern of higher risk  
50  
51 environment.<sup>49</sup>  
52  
53  
54  
55  
56  
57  
58  
59  
60

1  
2  
3  
4  
5 Relationship between mobility and HIV prevention: The proposed pathways showing  
6 higher mobility associated with HIV risk in other studies demonstrate that female sex  
7 workers who travel more often reported less consistent condom use, have higher STI  
8 symptoms, and greater perceived risk for HIV acquisition even after controlling for  
9 demographic and socio-economic factors including violence.<sup>53,29,54,55</sup> In our study, over  
10 80% of the participants were mobile, and we do note that reasons for mobility are  
11 qualitatively related to high-risk sexual behavior and are strong obstacles for HIV  
12 prevention behavior including consistent adherent condom use and use of PrEP  
13 medication.  
14  
15  
16  
17  
18  
19  
20  
21  
22  
23  
24  
25

26 Limitations and strengths: Our study was not originally powered to statistically measure  
27 the relationship between mobility and STI, HIV or unplanned pregnancy. We noted the  
28 high mobility on assessing the reasons for difficulty in retaining our study participants.  
29 This became a sub-study and we were then able to discuss, in-depth, the frequency,  
30 distances, reasons and context surrounding our participants' mobility.  
31  
32  
33  
34  
35  
36  
37  
38  
39

40 To improve our understanding of the dynamic and complex nature of movement, sexual  
41 behavior and the relationships between populations and disease transmission, Cassels  
42 et al. proposed a network-dyadic conceptual model to interpret previous studies and  
43 inform the development of services and research.<sup>56</sup> They propose that the transmission  
44 of HIV is dependent on movement and people's behavior which is influenced by the  
45 connecting of local sub-epidemics, and the effects on both sending and receiving  
46 communities.<sup>56</sup> We propose that the intricate, dynamic and complex nature of  
47  
48  
49  
50  
51  
52  
53  
54  
55  
56  
57  
58  
59  
60

1  
2  
3 relationships between both formal and informal sex work, poverty, substance use, family  
4 members, friends/colleagues, and queen mother relationship networks, violence, and  
5 mobility are constantly changing and impacting on each other in different and  
6 convoluted ways. How public health intervention development and implementation  
7 features into the complex interactions of the lives of participants is complex, delicate  
8 and the greater understanding we acquire into how mobility impacts on our ability to  
9 intervene the more effective these interventions will likely become. Study retention  
10 strategies and health care services should be informed by a more comprehensive and  
11 nuanced understanding of the complicated and tenuous lives of participants and  
12 services, and interventions should be tailored to suit mobility patterns. Peers, bar/lodge  
13 managers who have influence on YWHR lives and mobility should be involved in  
14 research activities if retention of YWHR is to be attained. We must build a mindful PrEP  
15 intervention appreciating that our beneficiaries are constantly on the move. This may  
16 look very different from a traditional clinic-based service that expects all clients to come  
17 on a regular basis for follow-up visits. A mobile clinic, conducted within active work  
18 venues, has been piloted to assess its feasibility for reducing the transport burden on  
19 highly mobile participants and increasing retention in care. We have attempted to  
20 understand whether and how mobility influences the effectiveness of HIV prevention  
21 services specifically with YWHR and the utility of identifying appropriate approaches  
22 and methods, inclusive of mobile populations, that are desperately needed at this critical  
23 moment in the HIV epidemic.<sup>27</sup>

### **Figure Legends**

**Figure 1:** Mapping data on reported work venues for young sex workers in Kampala

## Figure 2: The Factors influencing mobility among young sex workers in Kampala

### Footnotes

- Contributors: RK (PhD) conceived of the study. EM and DB conducted the geography data analysis and provided input on study design and study procedures. MM, a female research counsellor, participated in data collection. FK, MM and MN oversaw data collection. RK was primarily responsible for qualitative data analysis, with input from JS. All authors were involved in member-check. RK composed the first draft of the manuscript. All authors provided input and approved of the final submission.
- Funding: This study was supported by the National Institutes of Mental Health (R01MH109337), PI: Rachel King. All authors are independent from the funders and had full access to all of the data. All authors take responsibility for the integrity of the data and accuracy of the data analysis.
- Competing interests: None declared.
- Patient consent for publication: All participants gave written informed consent to participate.
- Ethics approval: This research was approved by the Uganda Virus Research Institute (#GC/127/16/08/527) and the Ugandan National Council for Science and Technology (#HS1886).
- Provenance and peer review: Not commissioned; externally peer reviewed.
- Data availability statement:
  - All data relevant to the study are included in the article

### REFERENCES

1. Idele P, Gillespie A, Porth T, et al. Epidemiology of HIV and AIDS among adolescents: current status, inequities, and data gaps. *J Acquir Immune Defic Syndr*. 2014;66 Suppl 2:S144-153.
2. Stover J, Rosen J, Kasedde S, Idele P, McClure C. The impact and cost of the HIV/AIDS investment framework for adolescents. *J Acquir Immune Defic Syndr*. 2014;66 Suppl 2:S170-175.
3. Busza J, Mtetwa, S., Mapfumo, R., Hanisch, D., Wong-Gruenwald, R., Cowan, F. Underage and underserved: reaching young women who sell sex in Zimbabwe. *AIDS CARE*. 2016;28(S2):14-20.

- 1  
2  
3 4. Hunter M. The materiality of everyday sex: thinking beyond "prostitution". *African*  
4  
5 *Studies*. 2002;61:99-120.  
6
- 7  
8 5. MacPherson EE, Sadalaki J, Njoloma M, et al. Transactional sex and HIV:  
9  
10 understanding the gendered structural drivers of HIV in fishing communities in  
11  
12 Southern Malawi. *J Int AIDS Soc*. 2012;15 Suppl 1:1-9.  
13
- 14  
15 6. Mbonye M, Nakamanya S, Nalukenge W, King R, Vandepitte J, Seeley J. 'It is  
16  
17 like a tomato stall where someone can pick what he likes': structure and practices  
18  
19 of female sex work in Kampala, Uganda. *BMC Public Health*. 2013;13:741.  
20
- 21  
22 7. Miller CL, Bangsberg DR, Tuller DM, et al. Food insecurity and sexual risk in an  
23  
24 HIV endemic community in Uganda. *AIDS Behav*. 2011;15(7):1512-1519.  
25
- 26  
27 8. Wamoyi J, Ranganathan M, Kyegombe N, Stoebenau K. Improving the  
28  
29 measurement of transactional sex in Sub-Saharan Africa: a critical review.  
30  
31 *Journal of Acquired Immune Deficiency Syndromes*. 2019;80(4):367.  
32
- 33  
34 9. Bantebya G, Muhanguzi, FK, Watson, C. *Adolescent girls in the balance:*  
35  
36 *Changes and continuity in social norms and practices around marriage and*  
37  
38 *education in Uganda*. Kampala, Uganda: ODI;2014.  
39
- 40  
41 10. Stoebenau K, Heise L, Wamoyi J, Bobrova N. Revisiting the understanding of  
42  
43 "transactional sex" in sub-Saharan Africa: a review and synthesis of the literature.  
44  
45 *Social Science and Medicine*. 2016;168:186-197.  
46
- 47  
48 11. Baral S, Beyrer C, Muessig K, et al. Burden of HIV among female sex workers in  
49  
50 low-income and middle-income countries: a systematic review and meta-  
51  
52 analysis. *Lancet Infectious Disease*. 2012;12(7):538-549.  
53  
54  
55  
56  
57  
58  
59  
60

- 1  
2  
3 12. Walker D, Perezniето, P, Bantebya, G, Ochen, E. *Sexual exploitation of*  
4  
5 *adolescent girls in Uganda: The drivers, consequences and responses to the*  
6  
7 *'sugar daddy' phenomenon*. Kampala, Uganda: ODI;2014.
- 8  
9  
10 13. Bakeera-Kitaka S, Nabukeera-Barungi N, Nostlinger C, Addy K, Colebunders R.  
11  
12 Sexual risk reduction needs of adolescents living with HIV in a clinical care  
13  
14 setting. *AIDS Care*. 2008;20(4):426-433.
- 15  
16  
17 14. Lowenthal ED, Bakeera-Kitaka S, Marukutira T, Chapman J, Goldrath K, Ferrand  
18  
19 RA. Perinatally acquired HIV infection in adolescents from sub-Saharan Africa: a  
20  
21 review of emerging challenges. *Lancet Infect Dis*. 2014;14(7):627-639.
- 22  
23  
24 15. MOH. *Uganda AIDS Indicator Survey 2011*. Kampala, Uganda and Calverton,  
25  
26 Maryland, USA2012.
- 27  
28  
29 16. MOH. *The Crane Survey Report*. Kampala, Uganda: MOH;2009.
- 30  
31  
32 17. Hladik W, Baughman AL, Serwadda D, et al. Burden and characteristics of HIV  
33  
34 infection among female sex workers in Kampala, Uganda - a respondent-driven  
35  
36 sampling survey. *BMC Public Health*. 2017;17(1):565.
- 37  
38  
39 18. Vandepitte J, Bukenya J, Weiss HA, et al. HIV and other sexually transmitted  
40  
41 infections in a cohort of women involved in high-risk sexual behavior in Kampala,  
42  
43 Uganda. *Sex Transm Dis*. 2011;38(4):316-323.
- 44  
45  
46 19. Goldenberg S, Silverman J, Engstrom D, Bojorquez-Chapela I, Strathdee S.  
47  
48 "Right Here is the Gateway": Mobility, Sex Work Entry and HIV Risk Along the  
49  
50 Mexico-U.S. Border. *Int Migr*. 2014;52(4):26-40.
- 51  
52  
53  
54  
55  
56  
57  
58  
59  
60

- 1  
2  
3 20. Goldenberg SM, Chettiar J, Simo A, et al. Early sex work initiation independently  
4 elevates odds of HIV infection and police arrest among adult sex workers in a  
5 Canadian setting. *J Acquir Immune Defic Syndr*. 2014;65(1):122-128.  
6  
7  
8  
9  
10 21. Goldenberg SM, Rangel G, Vera A, et al. Exploring the impact of underage sex  
11 work among female sex workers in two Mexico-US border cities. *AIDS Behav*.  
12 2012;16(4):969-981.  
13  
14  
15  
16  
17 22. Odinkova V, Rusakova M, Urada LA, Silverman JG, Raj A. Police sexual  
18 coercion and its association with risky sex work and substance use behaviors  
19 among female sex workers in St. Petersburg and Orenburg, Russia. *Int J Drug*  
20 *Policy*. 2014;25(1):96-104.  
21  
22  
23  
24  
25  
26 23. Rocha-Jimenez T, Brouwer KC, Silverman JG, Morales-Miranda S, Goldenberg  
27 SM. Exploring the Context and Implementation of Public Health Regulations  
28 Governing Sex Work: A Qualitative Study with Migrant Sex Workers in  
29 Guatemala. *J Immigr Minor Health*. 2016.  
30  
31  
32  
33  
34  
35 24. Servin AE, Brouwer KC, Gordon L, et al. Vulnerability Factors and Pathways  
36 Leading to Underage Entry into Sex Work in two Mexican-US Border Cities. *J*  
37 *Appl Res Child*. 2015;6(1).  
38  
39  
40  
41  
42 25. Silverman JG. Adolescent female sex workers: invisibility, violence and HIV. *Arch*  
43 *Dis Child*. 2011;96(5):478-481.  
44  
45  
46  
47 26. Saggurti N, Ravi K. Verma, Hanimi Reddy Modugu, Saumya RamaRao, Ajay  
48 Kumar Singh, Vaishali Sharma Mahendra, Anrudh K. Jain. *Patterns of*  
49 *migration/mobility and HIV risk among female sex workers: Andhra Pradesh*  
50 *Population Council*;2007.  
51  
52  
53  
54  
55  
56  
57  
58  
59  
60

- 1  
2  
3 27. Camlin CS, Cassels S, Seeley J. Bringing population mobility into focus to  
4 achieve HIV prevention goals. *J Int AIDS Soc.* 2018;21 Suppl 4:e25136.  
5  
6
- 7 28. Camlin CS, Akullian A, Neilands TB, et al. Gendered dimensions of population  
8 mobility associated with HIV across three epidemics in rural Eastern Africa.  
9  
10 *Health Place.* 2019;57:339-351.  
11  
12
- 13 29. Kishamawe C, Vissers DC, Urassa M, et al. Mobility and HIV in Tanzanian  
14 couples: both mobile persons and their partners show increased risk. *AIDS.*  
15 2006;20(4):601-608.  
16  
17
- 18 30. McGrath N, Eaton JW, Newell ML, Hosegood V. Migration, sexual behaviour,  
19 and HIV risk: a general population cohort in rural South Africa. *Lancet HIV.*  
20 2015;2(6):e252-259.  
21  
22
- 23 31. Camlin CS, El Ayadi AM, Kwena ZA, et al. High Mobility and HIV Prevalence  
24 Among Female Market Traders in East Africa in 2014. *J Acquir Immune Defic*  
25 *Syndr.* 2017;74(5):e121-e128.  
26  
27
- 28 32. Camlin CS, Akullian A, Neilands TB, et al. Population mobility associated with  
29 higher risk sexual behaviour in eastern African communities participating in a  
30 Universal Testing and Treatment trial. *J Int AIDS Soc.* 2018;21 Suppl 4:e25115.  
31  
32
- 33 33. Hernando V, Alvarez-del Arco D, Alejos B, et al. HIV Infection in Migrant  
34 Populations in the European Union and European Economic Area in 2007-2012:  
35 An Epidemic on the Move. *J Acquir Immune Defic Syndr.* 2015;70(2):204-211.  
36  
37
- 38 34. Cassels S, Camlin CS, Seeley J. One step ahead: timing and sexual networks in  
39 population mobility and HIV prevention and care. *J Int AIDS Soc.* 2018;21 Suppl  
40 4:e25140.  
41  
42  
43  
44  
45  
46  
47  
48  
49  
50  
51  
52  
53  
54  
55  
56  
57  
58  
59  
60



- 1  
2  
3 35. Vandepitte J WH, Bukenya J, Nakubulwa S, Mayanja Y, Matovu G, Kyakuwa  
4 N, Hughs P, Hayes R, Grosskurth, H. Alcohol use, Mycoplasma genitalium and  
5 other STIs associated with HIV incidence among women at high risk in Kampala,  
6 Uganda. *JAIDS*. 2013;62(1)(1):119-126.  
7  
8  
9  
10  
11  
12 36. Vandepitte J, Muller E, Bukenya J, et al. Prevalence and correlates of  
13 Mycoplasma genitalium infection among female sex workers in Kampala,  
14 Uganda. *J Infect Dis*. 2012;205(2):289-296.  
15  
16  
17  
18  
19 37. Vandepitte J WH, Kyakuwa N, Nakubulwa S, Muller E, Buve A, Van der Stuyft P,  
20 Hayes R, Grosskurth, H. Natural history of mycoplasma genitalium infection in a  
21 cohort of female sex workers in Kampala, Uganda. *Sex Transm Dis*.  
22 2013;40(5):422-427.  
23  
24  
25  
26  
27  
28 38. Bukenya J, Vandepitte J, Kwikiriza M, Weiss HA, Hayes R, Grosskurth H.  
29 Condom use among female sex workers in Uganda. *AIDS Care*. 2013;25(6):767-  
30 774.  
31  
32  
33  
34  
35 39. Francis SC, Baisley K, Lees SS, et al. Vaginal practices among women at high  
36 risk of HIV infection in Uganda and Tanzania: recorded behaviour from a daily  
37 pictorial diary. *PLoS One*. 2013;8(3):e59085.  
38  
39  
40  
41  
42 40. Mbonye M, Nalukenge W, Nakamanya S, et al. Gender inequity in the lives of  
43 women involved in sex work in Kampala, Uganda. *J Int AIDS Soc*. 2012;15 Suppl  
44 1:1-9.  
45  
46  
47  
48  
49 41. Boyatzis R. Transforming Qualitative Information: Thematic Analysis and Code  
50 Development. *SAGE Publications, Inc*. 1998.  
51  
52  
53  
54  
55  
56  
57  
58  
59  
60

- 1  
2  
3 42. MOH. *Adolescent Health Policy Guidelines and Service Standards for Uganda*.  
4  
5 *Uganda: MOH*. 2011.  
6  
7  
8 43. MOH. *Adolescent Sexual and Reproductive Health: A Job Aide 2012*. 2012.  
9  
10 44. WHO. Adolescent pregnancy. 2020; [https://www.who.int/newsroom/fact-](https://www.who.int/newsroom/fact-sheets/detail/adolescent-pregnancy)  
11 [sheets/detail/adolescent-pregnancy](https://www.who.int/newsroom/fact-sheets/detail/adolescent-pregnancy). Accessed 08 April 2020.  
12  
13  
14 45. UNFPA. *Adolescents and Young People in Sub-Saharan Africa Opportunities*  
15 *and Challenges*. Johannesburg: UNFPA;2012.  
16  
17  
18 46. Chiyaka T, Mushati P, Hensen B, et al. Reaching young women who sell sex:  
19 Methods and results of social mapping to describe and identify young women for  
20 DREAMS impact evaluation in Zimbabwe. *PLoS One*. 2018;13(3):e0194301.  
21  
22  
23  
24 47. Ramesh S, Ganju D, Mahapatra B, Mishra RM, Saggurti N. Relationship between  
25 mobility, violence and HIV/STI among female sex workers in Andhra Pradesh,  
26 India. *BMC Public Health*. 2012;12:764.  
27  
28  
29  
30  
31  
32 48. Saggurti N, Jain AK, Sebastian MP, et al. Indicators of mobility, socio-economic  
33 vulnerabilities and HIV risk behaviours among mobile female sex workers in  
34 India. *AIDS Behav*. 2012;16(4):952-959.  
35  
36  
37  
38  
39 49. STRIVE. *Addressing the structural drivers of HIV: A STRIVE synthesis* London  
40 School of Hygiene & Tropical Medicine; UK, 2019;2019.  
41  
42  
43  
44 50. Roberts ST, Haberer J, Celum C, et al. Intimate Partner Violence and Adherence  
45 to HIV Pre-exposure Prophylaxis (PrEP) in African Women in HIV Serodiscordant  
46 Relationships: A Prospective Cohort Study. *J Acquir Immune Defic Syndr*.  
47 2016;73(3):313-322.  
48  
49  
50  
51  
52  
53  
54  
55  
56  
57  
58  
59  
60

- 1  
2  
3 51. Amegbor PM, Pascoe L. Variations in Emotional, Sexual, and Physical Intimate  
4 Partner Violence Among Women in Uganda: A Multilevel Analysis. *J Interpers*  
5 *Violence*. 2019:886260519839429.  
6  
7  
8  
9  
10 52. Cabral A, J MB, Ngure K, et al. Intimate Partner Violence and Self-Reported Pre-  
11 exposure Prophylaxis Interruptions Among HIV-Negative Partners in HIV  
12 Serodiscordant Couples in Kenya and Uganda. *J Acquir Immune Defic Syndr*.  
13 2018;77(2):154-159.  
14  
15  
16  
17  
18  
19 53. Saggurti N, Ravi K. Verma, Hanimi Reddy Modugu, Saumya RamaRao, Ajay  
20 Kumar Singh, Vaishali Sharma Mahendra, and, Jain. AK. *Patterns of*  
21 *migration/mobility and HIV risk among female sex workers: Andhra Pradesh*  
22 *2007–08*. New Delhi, India: Population Council.;2008.  
23  
24  
25  
26  
27  
28 54. Saggurti N, Jain, AK., Sebastian, MP., Singh, R., Modugu, HR., Halli, SS.,  
29 Verma, RK. Indicators of Mobility, Socio-Economic Vulnerabilities and HIV Risk  
30 Behaviours Among Mobile Female Sex Workers in India. *AIDS Behav*.  
31 2012;16:952–959.  
32  
33  
34  
35  
36  
37 55. Camlin CS, Hosegood V, Newell ML, McGrath N, Barnighausen T, Snow RC.  
38 Gender, migration and HIV in rural KwaZulu-Natal, South Africa. *PLoS One*.  
39 2010;5(7):e11539.  
40  
41  
42  
43  
44 56. Cassels S, Jenness SM, Khanna AS. Conceptual framework and research  
45 methods for migration and HIV transmission dynamics. *AIDS Behav*.  
46 2014;18(12):2302-2313.  
47  
48  
49  
50  
51  
52  
53  
54  
55  
56  
57  
58  
59  
60

1  
2  
3  
4  
5  
6  
7  
8  
9  
10  
11  
12  
13  
14  
15  
16  
17  
18  
19  
20  
21  
22  
23  
24  
25  
26  
27  
28  
29  
30  
31  
32  
33  
34  
35  
36  
37  
38  
39  
40  
41  
42  
43  
44  
45  
46  
47  
48  
49  
50  
51  
52  
53  
54  
55  
56  
57  
58  
59  
60

For peer review only

Figure 1: Mapping data on reported work venues for young sex workers in Kampala



Figure 2: The Factors influencing mobility among young sex workers in Kampala



peer review only

## COREQ (Consolidated criteria for REporting Qualitative research) Checklist

A checklist of items that should be included in reports of qualitative research. You must report the page number in your manuscript where you consider each of the items listed in this checklist. If you have not included this information, either revise your manuscript accordingly before submitting or note N/A.

| Topic                                          | Item No. | Guide Questions/Description                                                                                                                              | Reported on Page No. |
|------------------------------------------------|----------|----------------------------------------------------------------------------------------------------------------------------------------------------------|----------------------|
| <b>Domain 1: Research team and reflexivity</b> |          |                                                                                                                                                          |                      |
| <i>Personal characteristics</i>                |          |                                                                                                                                                          |                      |
| Interviewer/facilitator                        | 1        | Which author/s conducted the interview or focus group?                                                                                                   | 18                   |
| Credentials                                    | 2        | What were the researcher's credentials? E.g. PhD, MD                                                                                                     | 6                    |
| Occupation                                     | 3        | What was their occupation at the time of the study?                                                                                                      | 6                    |
| Gender                                         | 4        | Was the researcher male or female?                                                                                                                       | 6                    |
| Experience and training                        | 5        | What experience or training did the researcher have?                                                                                                     | 6                    |
| <i>Relationship with participants</i>          |          |                                                                                                                                                          |                      |
| Relationship established                       | 6        | Was a relationship established prior to study commencement?                                                                                              | 6                    |
| Participant knowledge of the interviewer       | 7        | What did the participants know about the researcher? e.g. personal goals, reasons for doing the research                                                 | 6                    |
| Interviewer characteristics                    | 8        | What characteristics were reported about the interviewer/facilitator? e.g. Bias, assumptions, reasons and interests in the research topic                | 6                    |
| <b>Domain 2: Study design</b>                  |          |                                                                                                                                                          |                      |
| <i>Theoretical framework</i>                   |          |                                                                                                                                                          |                      |
| Methodological orientation and Theory          | 9        | What methodological orientation was stated to underpin the study? e.g. grounded theory, discourse analysis, ethnography, phenomenology, content analysis | 7                    |
| <i>Participant selection</i>                   |          |                                                                                                                                                          |                      |
| Sampling                                       | 10       | How were participants selected? e.g. purposive, convenience, consecutive, snowball                                                                       | 6                    |
| Method of approach                             | 11       | How were participants approached? e.g. face-to-face, telephone, mail, email                                                                              | 6                    |
| Sample size                                    | 12       | How many participants were in the study?                                                                                                                 | 7                    |
| Non-participation                              | 13       | How many people refused to participate or dropped out? Reasons?                                                                                          | 8                    |
| <i>Setting</i>                                 |          |                                                                                                                                                          |                      |
| Setting of data collection                     | 14       | Where was the data collected? e.g. home, clinic, workplace                                                                                               | 6                    |
| Presence of non-participants                   | 15       | Was anyone else present besides the participants and researchers?                                                                                        | 6                    |
| Description of sample                          | 16       | What are the important characteristics of the sample? e.g. demographic data, date                                                                        | 8                    |
| <i>Data collection</i>                         |          |                                                                                                                                                          |                      |
| Interview guide                                | 17       | Were questions, prompts, guides provided by the authors? Was it pilot tested?                                                                            | 5                    |
| Repeat interviews                              | 18       | Were repeat interviews carried out? If yes, how many?                                                                                                    | 8                    |
| Audio/visual recording                         | 19       | Did the research use audio or visual recording to collect the data?                                                                                      | 6                    |
| Field notes                                    | 20       | Were field notes made during and/or after the interview or focus group?                                                                                  | 6                    |
| Duration                                       | 21       | What was the duration of the interviews or focus group?                                                                                                  | 6                    |
| Data saturation                                | 22       | Was data saturation discussed?                                                                                                                           | na                   |
| Transcripts returned                           | 23       | Were transcripts returned to participants for comment and/or                                                                                             | na                   |

| Topic                                  | Item No. | Guide Questions/Description                                                                                                        | Reported on Page No. |
|----------------------------------------|----------|------------------------------------------------------------------------------------------------------------------------------------|----------------------|
|                                        |          | correction?                                                                                                                        |                      |
| <b>Domain 3: analysis and findings</b> |          |                                                                                                                                    |                      |
| <i>Data analysis</i>                   |          |                                                                                                                                    |                      |
| Number of data coders                  | 24       | How many data coders coded the data?                                                                                               | 7                    |
| Description of the coding tree         | 25       | Did authors provide a description of the coding tree?                                                                              | na                   |
| Derivation of themes                   | 26       | Were themes identified in advance or derived from the data?                                                                        | 7                    |
| Software                               | 27       | What software, if applicable, was used to manage the data?                                                                         | 7                    |
| Participant checking                   | 28       | Did participants provide feedback on the findings?                                                                                 | 7                    |
| <i>Reporting</i>                       |          |                                                                                                                                    |                      |
| Quotations presented                   | 29       | Were participant quotations presented to illustrate the themes/findings?<br>Was each quotation identified? e.g. participant number | 8-14                 |
| Data and findings consistent           | 30       | Was there consistency between the data presented and the findings?                                                                 | 15                   |
| Clarity of major themes                | 31       | Were major themes clearly presented in the findings?                                                                               | 15                   |
| Clarity of minor themes                | 32       | Is there a description of diverse cases or discussion of minor themes?                                                             |                      |

Developed from: Tong A, Sainsbury P, Craig J. Consolidated criteria for reporting qualitative research (COREQ): a 32-item checklist for interviews and focus groups. *International Journal for Quality in Health Care*. 2007. Volume 19, Number 6: pp. 349–357

**Once you have completed this checklist, please save a copy and upload it as part of your submission. DO NOT include this checklist as part of the main manuscript document. It must be uploaded as a separate file.**
